# Supplementary material
Source: Research Square preprint supplement (doi:10.21203/rs.3.rs-9251446/v1)
Supplement: Supplementary file 1 [file 33d924407f9d5903e8fd456c.docx]

Appendix I

Each locality name corresponds to an outcrop site. If multiple sites points are found in the same locality, additional details are provided, such as numbering or descriptions. The Bougouni Pegmatite Province uses the WGS84 (World Geodetic System of 1984) UTM Zone N 29 conformal projection. Sample names consist of four letters. The first letter, "S," stands for “SANOGO”, and the other three letters are a for the abbreviate of the sampling site name. TS: thin section; Rm: Raman spectroscopy; Ms: Microprobe, SEM: scanning electron microscope, and Spl: Sample. Fourteen of these samples were selected for analysis using a CAMECA SX100 electron microprobe at the Joint Microscopy Center of the high school of chemistry of the University of Lille. The operating conditions were 15 kV and 15 nA, with a 20-second counting time. The instrument is equipped with four wavelengths dispersive spectrometer (WDS) featuring PC1, PC2, PC3, LLiF, LPET and TAP analyzer crystals, one of which is vertical, as well as secondary and backscattered electron detectors. The analysis diameter is around 1 µm.

| **Group** | **Facies** | **Spl** | **X** | **Y** | **Z** | **Locality** | **TS** | **Rm** | **SEM** | **Ms** |
| --- | --- | --- | --- | --- | --- | --- | --- | --- | --- | --- |
| Plutonic | Monzogabbro | SBNK 49 | 671262 | 1225720 |  | Banko (1) | X | X |  | X |
| Plutonic | Monzogabbro | No | 668878 | 1221724 |  | Sienrou (2) |  |  |  |  |
| Plutonic | Quartz-gabbroic diorite | SBNK 72 | 671427 | 1225044 |  | Banko (2) | X | X | X | X |
| Plutonic | Quartz-gabbroic diorite | SSSK 28 | 673886 | 1257985 | 327 | Sinsinkourou | X |  |  | X |
| Plutonic | Quartz-gabbroic diorite | No | 673943 | 1258236 |  | Sinsinkourou |  |  |  |  |
| Plutonic | Quartz-gabbroic diorite | No | 673900 | 1257967 | 335 | Sinsinkourou |  |  |  |  |
| Plutonic | Granodiorite | SDIA 4 | 687124 | 1290226 | 328 | Diamana | X |  |  | X |
| Plutonic | Granodiorite | SDIA 6 | 688019 | 1291895 | 322 | Diamana | X |  |  |  |
| Plutonic | Granodiorite | SMSF 13 | 688554 | 1294514 | 325 | Diamana (Massafala) | X | X | X |  |
| Plutonic | Granodiorite | SSSK 23 | 673398 | 1257847 | 335 | Sinsinkourou | X | X |  |  |
| Plutonic | Granodiorite | SBGS 54 | 626474 | 1277300 |  | Bougoula (Sido) | X | X | X | X |
| Plutonic | Granodiorite | SMSL 75 | 673833 | 1262897 |  | Massala | X |  | X |  |
| Plutonic | Granodiorite | SSGL 32 | 652678 | 1253450 | 338 | Sogola (1) | X | X |  | X |
| Plutonic | Granodiorite | No | 652912 | 1254104 | 341 | Sogola (2) |  |  |  |  |
| Plutonic | Granodiorite | No | 652912 | 1254104 | 341 | Sogola (2) |  |  |  |  |
| Plutonic | Granodiorite | No | 652938 | 1252996 | 363 | Sogola (PB13) |  |  |  |  |
| Plutonic | Granodiorite | No | 685049 | 1292593 | 352 | Diamana |  |  |  |  |
| Plutonic | Granodiorite | No | 625475 | 1250017 | 404 | N’kémènè |  |  |  |  |
| Plutonic | Granodiorite | No | 686515 | 1289401 | 327 | Diamana |  |  |  |  |
| Plutonic | Granodiorite | No | 686889 | 1290221 | 339 | Diamana |  |  |  |  |
| Plutonic | Granodiorite | No | 686591 | 1291123 | 340 | Diamana |  |  |  |  |
| Plutonic | Granodiorite | No | 688070 | 1291479 | 325 | Diamana |  |  |  |  |
| Plutonic | Granodiorite | No | 658000 | 1292931 | 352 | Diamana |  |  |  |  |
| Plutonic | Granodiorite | No | 684897 | 1292288 | 351 | Diamana |  |  |  |  |
| Plutonic | Granodiorite | No | 644646 | 1252964 |  | Madina |  |  |  |  |
| Plutonic | Granodiorite | No | 644646 | 1252964 |  | Madina |  |  |  |  |
| Plutonic | Granodiorite | No | 673905 | 1262780 | 352 | Massala |  |  |  |  |
| Plutonic | Granodiorite | No | 673735 | 1257689 |  | Sinsinkourou |  |  |  |  |
| Plutonic | Granodiorite | No | 673335 | 1257689 | 309 | Sinsinkourou |  |  |  |  |
| Plutonic | Granodiorite | No | 673400 | 1257842 | 325 | Sinsinkourou |  |  |  |  |
| Plutonic | Granodiorite | No | 673551 | 1257872 | 328 | Sinsinkourou |  |  |  |  |
| Plutonic | Granodiorite | No | 673912 | 1258226 | 337 | Sinsinkourou |  |  |  |  |
| Plutonic | Quartz microdiorite | SDIA 79 | 686923 | 1290264 | 330 | Diamana | X |  |  |  |
| Plutonic | Quartz microdiorite | SSSK 24 | 673305 | 1257757 | 329 | Sinsinkourou | X |  |  |  |
| Plutonic | Quartz microdiorite | SSSK 50 | 673405 | 1257777 |  | Sinsinkourou | X | X |  | X |
| Plutonic | Quartz microdiorite | No | 644646 | 1252964 | 369 | Madina |  |  |  |  |
| Plutonic | Quartz microdiorite | No | 673735 | 1257689 |  | Sinsinkourou |  |  |  |  |
| Plutonic | Quartz microdiorite | No | 673335 | 1257689 | 309 | Sinsinkourou |  |  |  |  |
| Plutonic | Quartz microdiorite | No | 673400 | 1257842 | 325 | Sinsinkourou |  |  |  |  |
| Plutonic | Quartz microdiorite | No | 673551 | 1257872 | 328 | Sinsinkourou |  |  |  |  |
| Plutonic | Tonalite | SNKM 56 | 625434 | 1250141 |  | N’kémènè | X | X | X | X |
| Plutonic | Tonalite | STET 20 | 642460 | 1254826 | 381 | Tentou | X |  |  |  |
| Plutonic | Tonalite | STET 21 | 642438 | 1254837 | 381 | Tentou | X | X |  |  |
| Plutonic | Tonalite | STET 59 | 640584 | 1254961 |  | Tentou | X |  |  |  |
| Plutonic | Tonalite | No | 640584 | 1254964 | 387 | Tentou |  |  |  |  |
| Plutonic | Biotite monzogranite | SDIA 7 | 684896 | 1292217 | 341 | Diamana | X |  |  |  |
| Plutonic | Biotite monzogranite | SDGN 82 | 662212 | 1267949 |  | Djiguénina | X | X |  |  |
| Plutonic | Biotite monzogranite | SFGR 19 | 613851 | 1251871 | 362 | Faragouran | X |  |  |  |
| Plutonic | Biotite monzogranite | STRU 90 | 634994 | 1282164 |  | Tiéourou | X |  |  |  |
| Plutonic | Biotite monzogranite | STGL 38 | 613023 | 1288846 | 384 | Tinguéléni | X | X | X | X |
| Plutonic | Biotite monzogranite | SSDO 36 | 652700 | 1286178 | 350 | Sido | X |  |  |  |
| Plutonic | Biotite monzogranite | SNML 57 | 652641 | 1233061 |  | Nimissila | X | X | X | X |
| Plutonic | Biotite monzogranite | STRU76 | 634994 | 1282164 |  | Tiéourou | X |  |  |  |
| Plutonic | Biotite monzogranite | SDKN 84 | 638140 | 1272146 |  | Denkéléna | X |  |  |  |
| Plutonic | Biotite monzogranite | STRU 91 | 634994 | 1282164 |  | Tiéourou | X |  |  |  |
| Plutonic | Biotite monzogranite | No | 613016 | 1288812 | 405 | Tinguéléni |  |  |  |  |
| Plutonic | Biotite monzogranite | No | 687926 | 1291401 | 323 | Diamana |  |  |  |  |
| Plutonic | Pink biotite monzogranite | SDIA 10 | 684799 | 1292323 |  | Diamana | X |  |  |  |
| Plutonic | Pink biotite monzogranite | SSSK 22 | 673303 | 1257783 | 325 | Sinsinkourou | X | X |  |  |
| Plutonic | Pink biotite monzogranite | STKL 60 | 708992 | 1280739 |  | Tinkéléni | X | X |  | X |
| Plutonic | Pink biotite monzogranite | No | 673312 | 1257793 | 333 | Sinsinkourou |  |  |  |  |
| Plutonic | Pink biotite monzogranite | No | 686523 | 1291405 |  | Diamana |  |  |  |  |
| Plutonic | Pink biotite monzogranite | No | 644646 | 1252964 |  | Madina |  |  |  |  |
| Plutonic | Two-mica monzogranite | SBKO 52 | 650205 | 1317640 |  | Biko | X | X | X | X |
| Plutonic | Two-mica monzogranite | SBLD 53 | 699507 | 1225471 |  | Biladiè | X | X |  | X |
| Plutonic | Two-mica monzogranite | SKBL 67 | 711346 | 1246089 |  | Kébila (1) | X |  |  |  |
| Plutonic | Two-mica monzogranite | SKBL 78 | 712997 | 1246551 |  | Kébila (2) | X |  |  |  |
| Plutonic | Two-mica monzogranite | SNGK 58 | 664812 | 1229266 |  | N'gouanko | X |  |  |  |
| Plutonic | Two-mica monzogranite | STNR 51 | 681554 | 1312869 |  | Tyinra | X | X |  |  |
| Plutonic | Two-mica monzogranite | SDKA 66 | 708321 | 1233018 |  | Diaka | X | X |  |  |
| Plutonic | Two-mica monzogranite | SSSL 81 | 666603 | 1245892 |  | Sansola | X |  |  |  |
| Plutonic | Two-mica monzogranite | SBGK 80 | 707550 | 1243817 |  | Bougoula (Kébila) | X |  |  |  |
| Plutonic | Two-mica monzogranite | SMKL 77 | 717035 | 1237233 |  | Mantakala | X |  |  |  |
| Plutonic | Two-mica monzogranite | STTL 55 | 710861 | 1240114 |  | Tountourla | X | X |  |  |
| Plutonic | Two-mica monzogranite | No | 682845 | 1314072 |  | Dogo |  |  |  |  |
| Plutonic | Two-mica monzogranite | No | 716280 | 1262648 |  | Koualé |  |  |  |  |
| Plutonic | Two-mica monzogranite | No | 713630 | 1228000 |  | Massamakana |  |  |  |  |
| Plutonic | Two-mica monzogranite | No | 703455 | 1225544 |  | N'tiobala |  |  |  |  |
| Plutonic | Two-mica monzogranite | No | 681903 | 1269905 |  | Korosso |  |  |  |  |

Appendix II

Appendix II.1: Amphiboles (A0-1B2C5T8O22W2)

Appendix II.1.1: Quartz-gabbroic diorite (SSSK28, SBNK72)

| **a.n.** | **SiO2** | **TiO2** | **Al2O3** | **MnO** | **FeO** | **MgO** | **CaO** | **Na2O** | **K2O** | **Total** | **SiT** | **AlT** | **TiC** | **AlC** | **FeC** | **MgC** | **FeB** | **CaB** | **NaB** | **CaB** | **NaA** | **KA** |
| --- | --- | --- | --- | --- | --- | --- | --- | --- | --- | --- | --- | --- | --- | --- | --- | --- | --- | --- | --- | --- | --- | --- |
| 75 / 1 | 51.13 | 0.27 | 6.06 | 0.17 | 9.86 | 16.03 | 12.05 | 0.94 | 0.25 | 96.77 | 7.36 | 0.64 | 0.03 | 0.39 | 1.13 | 3.44 | 0.06 | 1.86 | 0.07 | 1.86 | 0.20 | 0.05 |
| 74 / 1 | 50.79 | 0.40 | 6.54 | 0.22 | 10.31 | 15.86 | 11.73 | 1.11 | 0.17 | 97.13 | 7.29 | 0.71 | 0.04 | 0.40 | 1.14 | 3.40 | 0.10 | 1.81 | 0.07 | 1.81 | 0.24 | 0.03 |
| 73 / 1 | 53.95 | 0.15 | 3.62 | 0.23 | 9.57 | 17.39 | 11.83 | 0.67 | 0.05 | 97.45 | 7.65 | 0.35 | 0.02 | 0.26 | 1.04 | 3.68 | 0.10 | 1.80 | 0.07 | 1.80 | 0.11 | 0.01 |
| 72 / 1 | 52.62 | 0.19 | 4.75 | 0.22 | 9.98 | 16.84 | 11.89 | 0.73 | 0.11 | 97.32 | 7.50 | 0.50 | 0.02 | 0.30 | 1.08 | 3.58 | 0.11 | 1.82 | 0.04 | 1.82 | 0.16 | 0.02 |
| 71 / 1 | 50.56 | 0.33 | 6.37 | 0.24 | 10.30 | 16.03 | 11.71 | 0.97 | 0.40 | 96.91 | 7.29 | 0.71 | 0.04 | 0.37 | 1.13 | 3.45 | 0.11 | 1.81 | 0.05 | 1.81 | 0.22 | 0.07 |
|  | 53.84 | 0.13 | 2.50 | 0.19 | 9.74 | 17.07 | 12.72 | 0.32 | 0.10 | 96.60 | 7.72 | 0.27 | 0.01 | 0.15 | 1.16 | 3.65 | 0.01 | 1.96 | 0.02 | 1.96 | 0.07 | 0.02 |
| 98 / 1 | 53.07 | 0.16 | 3.75 | 0.18 | 9.49 | 17.22 | 12.44 | 0.49 | 0.09 | 96.89 | 7.59 | 0.41 | 0.02 | 0.23 | 1.08 | 3.67 | 0.06 | 1.91 | 0.01 | 1.91 | 0.13 | 0.02 |
| 97 / 1 | 52.97 | 0.26 | 4.54 | 0.17 | 9.29 | 17.24 | 12.16 | 0.73 | 0.12 | 97.47 | 7.53 | 0.47 | 0.03 | 0.29 | 1.03 | 3.65 | 0.08 | 1.85 | 0.05 | 1.85 | 0.15 | 0.02 |
| 96 / 1 . | 53.22 | 0.19 | 3.94 | 0.20 | 9.22 | 17.44 | 11.99 | 0.60 | 0.04 | 96.83 | 7.60 | 0.40 | 0.02 | 0.26 | 1.00 | 3.71 | 0.10 | 1.83 | 0.04 | 1.83 | 0.13 | 0.01 |
| 95 / 1 | 52.80 | 0.25 | 4.56 | 0.28 | 9.79 | 16.78 | 11.61 | 0.70 | 0.12 | 96.90 | 7.55 | 0.45 | 0.03 | 0.32 | 1.06 | 3.58 | 0.11 | 1.78 | 0.08 | 1.78 | 0.12 | 0.02 |
| 203 / 1 | 50.40 | 0.76 | 6.32 | 0.20 | 12.02 | 14.47 | 12.56 | 0.59 | 0.40 | 97.73 | 7.27 | 0.73 | 0.08 | 0.34 | 1.43 | 3.11 | 0.02 | 1.94 | 0.02 | 1.94 | 0.15 | 0.07 |
| 204 / 1 . | 53.41 | 0.23 | 3.90 | 0.17 | 11.19 | 15.90 | 12.71 | 0.23 | 0.24 | 97.99 | 7.60 | 0.40 | 0.03 | 0.26 | 1.32 | 3.37 | 0.02 | 1.94 | 0.02 | 1.94 | 0.04 | 0.04 |
| 205 / 1 . | 50.50 | 0.85 | 6.35 | 0.23 | 12.36 | 14.11 | 12.22 | 0.42 | 0.49 | 97.54 | 7.30 | 0.70 | 0.09 | 0.38 | 1.46 | 3.04 | 0.03 | 1.89 | 0.05 | 1.89 | 0.07 | 0.09 |
| 206 / 1 . | 47.20 | 1.10 | 8.66 | 0.20 | 12.24 | 13.67 | 12.32 | 0.98 | 0.73 | 97.11 | 6.91 | 1.09 | 0.12 | 0.41 | 1.46 | 2.98 | 0.04 | 1.93 | 0.00 | 1.93 | 0.27 | 0.14 |
| 153 / 1 . | 45.31 | 0.99 | 10.71 | 0.20 | 12.40 | 13.06 | 12.20 | 1.24 | 0.81 | 96.93 | 6.68 | 1.32 | 0.11 | 0.54 | 1.46 | 2.87 | 0.07 | 1.91 | 0.00 | 1.93 | 0.35 | 0.15 |
| 154 / 1 . | 45.09 | 0.88 | 10.98 | 0.22 | 12.82 | 12.90 | 12.16 | 1.38 | 0.89 | 97.32 | 6.64 | 1.36 | 0.10 | 0.54 | 1.51 | 2.83 | 0.07 | 1.90 | 0.00 | 1.92 | 0.39 | 0.17 |
| 155 / 1 . | 54.20 | 0.08 | 1.40 | 0.29 | 14.03 | 14.44 | 12.63 | 0.15 | 0.06 | 97.28 | 7.86 | 0.14 | 0.01 | 0.10 | 1.70 | 3.12 | 0.00 | 1.96 | 0.04 | 1.96 | 0.01 | 0.01 |
| 156 / 1 . | 50.40 | 0.70 | 6.19 | 0.22 | 11.26 | 14.88 | 12.38 | 0.64 | 0.39 | 97.06 | 7.29 | 0.71 | 0.08 | 0.35 | 1.34 | 3.21 | 0.02 | 1.92 | 0.03 | 1.92 | 0.15 | 0.07 |
| 159 / 1 . | 48.81 | 0.88 | 7.75 | 0.15 | 11.68 | 14.41 | 12.42 | 0.64 | 0.62 | 97.36 | 7.08 | 0.92 | 0.10 | 0.41 | 1.36 | 3.12 | 0.06 | 1.93 | 0.00 | 1.93 | 0.18 | 0.12 |
| 160 / 1 . | 49.65 | 0.69 | 6.98 | 0.25 | 11.01 | 14.66 | 12.48 | 0.59 | 0.56 | 96.88 | 7.20 | 0.80 | 0.08 | 0.39 | 1.33 | 3.17 | 0.01 | 1.94 | 0.02 | 1.94 | 0.14 | 0.10 |
| 161 / 1 . | 51.01 | 0.20 | 6.05 | 0.19 | 11.52 | 15.05 | 12.52 | 0.43 | 0.36 | 97.32 | 7.33 | 0.66 | 0.02 | 0.36 | 1.33 | 3.22 | 0.05 | 1.92 | 0.00 | 1.93 | 0.12 | 0.07 |
| 162 / 1 . | 50.15 | 0.72 | 6.21 | 0.21 | 11.08 | 15.11 | 12.41 | 0.62 | 0.43 | 96.94 | 7.26 | 0.74 | 0.08 | 0.32 | 1.31 | 3.26 | 0.04 | 1.93 | 0.01 | 1.93 | 0.16 | 0.08 |
| 79 / 1 | 51.06 | 0.32 | 6.25 | 0.20 | 10.37 | 16.02 | 11.41 | 1.05 | 0.26 | 96.95 | 7.34 | 0.66 | 0.04 | 0.40 | 1.11 | 3.43 | 0.14 | 1.76 | 0.08 | 1.76 | 0.21 | 0.05 |
| 80 / 1 | 52.54 | 0.31 | 4.88 | 0.24 | 9.61 | 17.03 | 11.87 | 0.69 | 0.28 | 97.46 | 7.48 | 0.51 | 0.03 | 0.30 | 1.04 | 3.62 | 0.11 | 1.81 | 0.05 | 1.81 | 0.14 | 0.05 |
| 81 / 1 | 52.63 | 0.26 | 4.53 | 0.20 | 9.56 | 16.91 | 11.81 | 0.84 | 0.10 | 96.84 | 7.52 | 0.48 | 0.03 | 0.29 | 1.05 | 3.60 | 0.09 | 1.81 | 0.08 | 1.81 | 0.16 | 0.02 |
| 82 / 1 | 53.89 | 0.26 | 3.36 | 0.22 | 9.50 | 17.95 | 11.38 | 0.54 | 0.08 | 97.18 | 7.66 | 0.34 | 0.03 | 0.22 | 0.94 | 3.80 | 0.19 | 1.73 | 0.05 | 1.73 | 0.10 | 0.02 |
| 83 / 1 | 54.34 | 0.12 | 3.04 | 0.20 | 8.93 | 18.12 | 11.82 | 0.46 | 0.11 | 97.15 | 7.71 | 0.29 | 0.01 | 0.21 | 0.93 | 3.83 | 0.13 | 1.80 | 0.05 | 1.80 | 0.08 | 0.02 |
| 87 / 1 | 51.82 | 0.29 | 5.03 | 0.20 | 9.85 | 16.76 | 11.67 | 0.85 | 0.17 | 96.63 | 7.45 | 0.55 | 0.03 | 0.30 | 1.06 | 3.59 | 0.13 | 1.80 | 0.05 | 1.80 | 0.19 | 0.03 |
| 90/ 1 . | 53.13 | 0.23 | 3.90 | 0.20 | 9.78 | 17.25 | 11.55 | 0.68 | 0.24 | 96.97 | 7.59 | 0.41 | 0.03 | 0.25 | 1.03 | 3.68 | 0.14 | 1.77 | 0.07 | 1.77 | 0.12 | 0.04 |
| 89 / 1 | 51.85 | 0.32 | 5.20 | 0.23 | 10.10 | 16.55 | 11.38 | 1.03 | 0.34 | 97.00 | 7.44 | 0.56 | 0.04 | 0.32 | 1.09 | 3.54 | 0.13 | 1.75 | 0.10 | 1.75 | 0.19 | 0.06 |
| 88/ 1 . | 52.52 | 0.17 | 5.08 | 0.22 | 9.61 | 17.19 | 11.66 | 0.92 | 0.19 | 97.55 | 7.47 | 0.54 | 0.02 | 0.32 | 1.00 | 3.64 | 0.14 | 1.78 | 0.06 | 1.78 | 0.19 | 0.04 |
| 84 / 1 | 54.01 | 0.08 | 2.66 | 0.25 | 9.30 | 17.99 | 11.43 | 0.49 | 0.11 | 96.33 | 7.73 | 0.26 | 0.01 | 0.19 | 0.95 | 3.84 | 0.16 | 1.75 | 0.06 | 1.75 | 0.08 | 0.02 |
| 86 / 1 | 52.67 | 0.20 | 4.53 | 0.23 | 9.42 | 17.17 | 11.66 | 0.67 | 0.12 | 96.66 | 7.54 | 0.46 | 0.02 | 0.30 | 0.99 | 3.66 | 0.13 | 1.79 | 0.05 | 1.79 | 0.13 | 0.02 |
| 212 / 1 . | 50.69 | 0.60 | 6.09 | 0.23 | 11.96 | 14.58 | 12.43 | 0.50 | 0.36 | 97.41 | 7.32 | 0.68 | 0.07 | 0.36 | 1.41 | 3.14 | 0.03 | 1.92 | 0.02 | 1.92 | 0.12 | 0.07 |
| 213 / 1 . | 54.43 | 0.09 | 2.45 | 0.20 | 10.62 | 16.70 | 12.65 | 0.20 | 0.15 | 97.48 | 7.76 | 0.24 | 0.01 | 0.17 | 1.25 | 3.55 | 0.02 | 1.93 | 0.03 | 1.93 | 0.03 | 0.03 |
| 214 / 1 . | 51.17 | 0.54 | 5.80 | 0.21 | 11.70 | 14.81 | 12.46 | 0.64 | 0.42 | 97.74 | 7.36 | 0.64 | 0.06 | 0.35 | 1.40 | 3.18 | 0.01 | 1.92 | 0.05 | 1.92 | 0.13 | 0.08 |
| 144 / 1 . | 48.92 | 0.74 | 7.13 | 0.17 | 11.50 | 14.48 | 12.36 | 0.66 | 0.57 | 96.53 | 7.15 | 0.85 | 0.08 | 0.37 | 1.36 | 3.15 | 0.04 | 1.93 | 0.00 | 1.93 | 0.18 | 0.11 |
| 145 / 1 . | 52.15 | 0.13 | 4.60 | 0.21 | 11.21 | 15.77 | 12.64 | 0.34 | 0.24 | 97.30 | 7.50 | 0.51 | 0.01 | 0.27 | 1.30 | 3.38 | 0.04 | 1.93 | 0.00 | 1.95 | 0.10 | 0.05 |
| 146 / 1 . | 53.11 | 0.19 | 4.13 | 0.22 | 10.90 | 16.07 | 12.55 | 0.35 | 0.28 | 97.80 | 7.57 | 0.43 | 0.02 | 0.27 | 1.27 | 3.42 | 0.03 | 1.92 | 0.03 | 1.92 | 0.07 | 0.05 |
| 123 / 1 . | 50.47 | 0.69 | 6.00 | 0.21 | 11.42 | 15.53 | 12.32 | 0.85 | 0.43 | 97.92 | 7.26 | 0.74 | 0.08 | 0.28 | 1.30 | 3.33 | 0.07 | 1.90 | 0.01 | 1.90 | 0.23 | 0.08 |
| 124 / 1 . | 52.99 | 0.21 | 4.27 | 0.21 | 11.21 | 16.05 | 12.56 | 0.33 | 0.25 | 98.07 | 7.55 | 0.45 | 0.02 | 0.27 | 1.29 | 3.41 | 0.05 | 1.92 | 0.01 | 1.92 | 0.08 | 0.05 |
| 129 / 1 . | 52.62 | 0.13 | 4.29 | 0.24 | 11.28 | 15.68 | 12.64 | 0.37 | 0.24 | 97.48 | 7.53 | 0.47 | 0.01 | 0.25 | 1.33 | 3.35 | 0.02 | 1.94 | 0.01 | 1.94 | 0.09 | 0.04 |
| 130 / 1 . | 51.81 | 0.16 | 4.67 | 0.20 | 12.44 | 14.85 | 12.53 | 0.36 | 0.25 | 97.28 | 7.48 | 0.52 | 0.02 | 0.27 | 1.46 | 3.19 | 0.04 | 1.93 | 0.00 | 1.94 | 0.10 | 0.05 |
| 131 / 1 . | 51.87 | 0.50 | 4.89 | 0.23 | 11.73 | 15.32 | 12.60 | 0.32 | 0.30 | 97.76 | 7.44 | 0.56 | 0.05 | 0.27 | 1.37 | 3.28 | 0.04 | 1.94 | 0.00 | 1.94 | 0.09 | 0.05 |
| 173 / 1 . | 52.82 | 0.16 | 4.08 | 0.24 | 11.08 | 15.82 | 12.47 | 0.49 | 0.25 | 97.39 | 7.57 | 0.43 | 0.02 | 0.26 | 1.31 | 3.38 | 0.02 | 1.91 | 0.04 | 1.91 | 0.10 | 0.05 |
| 172 / 1 . | 50.61 | 0.83 | 5.55 | 0.23 | 11.03 | 15.05 | 12.42 | 0.57 | 0.43 | 96.74 | 7.34 | 0.66 | 0.09 | 0.29 | 1.34 | 3.25 | 0.00 | 1.93 | 0.04 | 1.93 | 0.12 | 0.08 |
| 171 / 1 . | 52.10 | 0.31 | 4.89 | 0.22 | 11.42 | 15.48 | 12.32 | 0.52 | 0.32 | 97.58 | 7.48 | 0.52 | 0.03 | 0.30 | 1.33 | 3.31 | 0.04 | 1.89 | 0.04 | 1.89 | 0.11 | 0.06 |
| 178 / 1 . | 50.39 | 0.47 | 6.60 | 0.25 | 12.41 | 13.97 | 12.57 | 0.49 | 0.45 | 97.60 | 7.28 | 0.72 | 0.05 | 0.41 | 1.50 | 3.01 | 0.00 | 1.95 | 0.02 | 1.95 | 0.12 | 0.08 |
| 177 / 1 . | 48.78 | 1.00 | 7.32 | 0.23 | 11.78 | 14.04 | 12.39 | 0.64 | 0.57 | 96.76 | 7.12 | 0.88 | 0.11 | 0.38 | 1.42 | 3.06 | 0.02 | 1.94 | 0.02 | 1.94 | 0.16 | 0.11 |
| 176 / 1 . | 51.35 | 0.66 | 5.81 | 0.23 | 10.56 | 15.92 | 12.56 | 0.59 | 0.43 | 98.11 | 7.32 | 0.68 | 0.07 | 0.30 | 1.22 | 3.39 | 0.04 | 1.92 | 0.01 | 1.92 | 0.15 | 0.08 |
| 152 / 1 . | 49.49 | 0.85 | 7.63 | 0.20 | 11.74 | 14.29 | 12.31 | 0.72 | 0.52 | 97.75 | 7.14 | 0.86 | 0.09 | 0.44 | 1.38 | 3.07 | 0.03 | 1.90 | 0.04 | 1.90 | 0.17 | 0.10 |
| 151 / 1 . | 49.52 | 0.73 | 7.00 | 0.22 | 11.01 | 15.12 | 12.06 | 0.85 | 0.46 | 96.97 | 7.17 | 0.83 | 0.08 | 0.37 | 1.26 | 3.27 | 0.08 | 1.87 | 0.03 | 1.87 | 0.21 | 0.09 |
| 150 / 1 . | 52.98 | 0.19 | 4.54 | 0.22 | 10.87 | 15.87 | 12.66 | 0.34 | 0.28 | 97.95 | 7.54 | 0.46 | 0.02 | 0.31 | 1.28 | 3.37 | 0.01 | 1.93 | 0.03 | 1.93 | 0.06 | 0.05 |
| 76 / 1 | 50.30 | 0.24 | 6.96 | 0.26 | 10.21 | 15.92 | 11.54 | 1.07 | 0.38 | 96.88 | 7.25 | 0.75 | 0.03 | 0.43 | 1.10 | 3.42 | 0.13 | 1.78 | 0.06 | 1.78 | 0.24 | 0.07 |
| 77 / 1 | 52.76 | 0.21 | 4.53 | 0.17 | 9.24 | 17.18 | 12.18 | 0.68 | 0.16 | 97.12 | 7.52 | 0.48 | 0.02 | 0.29 | 1.03 | 3.65 | 0.08 | 1.86 | 0.04 | 1.86 | 0.15 | 0.03 |
| 185 / 1 . | 54.83 | 0.06 | 2.00 | 0.24 | 10.68 | 17.73 | 12.99 | 0.10 | 0.08 | 98.70 | 7.73 | 0.27 | 0.01 | 0.07 | 1.19 | 3.73 | 0.08 | 1.90 | 0.00 | 1.96 | 0.03 | 0.01 |
| 186 / 1 . | 54.26 | 0.03 | 3.31 | 0.25 | 10.10 | 16.68 | 12.79 | 0.17 | 0.11 | 97.71 | 7.70 | 0.29 | 0.00 | 0.26 | 1.20 | 3.53 | 0.00 | 1.95 | 0.03 | 1.95 | 0.02 | 0.02 |
| 187 / 1 . | 51.86 | 0.43 | 5.08 | 0.22 | 11.64 | 15.60 | 12.48 | 0.51 | 0.33 | 98.16 | 7.42 | 0.58 | 0.05 | 0.28 | 1.34 | 3.33 | 0.06 | 1.91 | 0.00 | 1.91 | 0.14 | 0.06 |
| 188 / 1 . | 49.97 | 0.59 | 6.27 | 0.22 | 11.84 | 15.03 | 12.29 | 0.75 | 0.41 | 97.38 | 7.21 | 0.79 | 0.06 | 0.28 | 1.35 | 3.23 | 0.08 | 1.89 | 0.00 | 1.90 | 0.21 | 0.08 |
| 189 / 1 . | 50.42 | 0.60 | 6.35 | 0.19 | 11.38 | 15.00 | 12.36 | 0.72 | 0.43 | 97.46 | 7.26 | 0.74 | 0.07 | 0.34 | 1.33 | 3.22 | 0.04 | 1.91 | 0.03 | 1.91 | 0.18 | 0.08 |
| 190 / 1 . | 54.00 | 0.05 | 2.96 | 0.21 | 11.11 | 16.18 | 12.63 | 0.26 | 0.14 | 97.53 | 7.69 | 0.30 | 0.01 | 0.19 | 1.30 | 3.44 | 0.02 | 1.93 | 0.03 | 1.93 | 0.05 | 0.03 |
| 193 / 1 . | 51.95 | 0.27 | 4.22 | 0.22 | 10.92 | 15.82 | 12.66 | 0.36 | 0.29 | 96.71 | 7.45 | 0.55 | 0.03 | 0.17 | 1.27 | 3.38 | 0.04 | 1.94 | 0.00 | 1.95 | 0.10 | 0.05 |
| 194 / 1 . | 53.98 | 0.09 | 3.11 | 0.22 | 10.79 | 16.11 | 12.65 | 0.17 | 0.16 | 97.28 | 7.70 | 0.30 | 0.01 | 0.22 | 1.29 | 3.43 | 0.00 | 1.93 | 0.04 | 1.93 | 0.01 | 0.03 |
| 196 / 1 . | 46.06 | 1.17 | 10.02 | 0.22 | 12.66 | 12.59 | 12.13 | 1.11 | 0.74 | 96.70 | 6.78 | 1.21 | 0.13 | 0.53 | 1.54 | 2.76 | 0.02 | 1.91 | 0.04 | 1.91 | 0.28 | 0.14 |
| 207 / 1 . | 47.47 | 1.24 | 8.46 | 0.21 | 12.45 | 13.68 | 12.22 | 0.96 | 0.67 | 97.37 | 6.93 | 1.07 | 0.14 | 0.39 | 1.47 | 2.98 | 0.05 | 1.91 | 0.01 | 1.91 | 0.26 | 0.12 |
| 208 / 1 . | 50.75 | 0.85 | 6.15 | 0.20 | 11.21 | 15.25 | 12.29 | 0.92 | 0.46 | 98.09 | 7.27 | 0.73 | 0.09 | 0.31 | 1.32 | 3.26 | 0.03 | 1.89 | 0.06 | 1.89 | 0.19 | 0.08 |
| 223 / 1 . | 46.08 | 1.05 | 11.11 | 0.22 | 13.14 | 12.02 | 12.33 | 0.90 | 0.81 | 97.65 | 6.73 | 1.27 | 0.12 | 0.64 | 1.58 | 2.61 | 0.02 | 1.93 | 0.03 | 1.93 | 0.23 | 0.15 |
| 222 / 1 . | 50.90 | 0.52 | 5.69 | 0.22 | 11.97 | 14.62 | 12.55 | 0.31 | 0.42 | 97.20 | 7.36 | 0.64 | 0.06 | 0.33 | 1.42 | 3.15 | 0.03 | 1.94 | 0.00 | 1.94 | 0.08 | 0.08 |
| 137 / 1 . | 47.22 | 0.95 | 9.33 | 0.20 | 12.91 | 12.85 | 12.35 | 0.95 | 0.86 | 97.63 | 6.89 | 1.11 | 0.10 | 0.50 | 1.57 | 2.79 | 0.01 | 1.93 | 0.03 | 1.93 | 0.24 | 0.16 |
| 136 / 1 . | 46.98 | 1.21 | 9.18 | 0.22 | 12.35 | 13.61 | 12.39 | 1.07 | 0.68 | 97.69 | 6.84 | 1.16 | 0.13 | 0.42 | 1.46 | 2.96 | 0.05 | 1.93 | 0.00 | 1.93 | 0.30 | 0.13 |
| 139 / 1 . | 44.39 | 1.07 | 10.94 | 0.22 | 13.63 | 11.94 | 12.04 | 1.16 | 0.92 | 96.31 | 6.62 | 1.38 | 0.12 | 0.54 | 1.63 | 2.65 | 0.07 | 1.91 | 0.00 | 1.92 | 0.33 | 0.18 |
| 138 / 1 . | 49.43 | 0.91 | 7.33 | 0.20 | 11.93 | 14.19 | 12.45 | 0.66 | 0.55 | 97.65 | 7.14 | 0.86 | 0.10 | 0.39 | 1.42 | 3.06 | 0.02 | 1.93 | 0.03 | 1.93 | 0.16 | 0.10 |
| 182 / 1 . | 54.20 | 0.10 | 2.60 | 0.27 | 11.15 | 16.34 | 12.78 | 0.16 | 0.14 | 97.73 | 7.74 | 0.26 | 0.01 | 0.17 | 1.33 | 3.48 | 0.01 | 1.95 | 0.01 | 1.95 | 0.04 | 0.03 |
| 183 / 1 . | 52.37 | 0.51 | 4.93 | 0.23 | 11.21 | 15.44 | 12.59 | 0.34 | 0.38 | 98.01 | 7.48 | 0.52 | 0.06 | 0.31 | 1.33 | 3.29 | 0.01 | 1.93 | 0.04 | 1.93 | 0.06 | 0.07 |
| 133 / 1 . | 47.60 | 0.99 | 8.96 | 0.25 | 12.90 | 12.88 | 12.40 | 0.65 | 0.79 | 97.43 | 6.95 | 1.05 | 0.11 | 0.49 | 1.56 | 2.80 | 0.01 | 1.94 | 0.02 | 1.94 | 0.17 | 0.15 |
| 181 / 1 . | 50.08 | 0.67 | 6.73 | 0.27 | 12.29 | 13.93 | 12.39 | 0.45 | 0.56 | 97.37 | 7.26 | 0.74 | 0.07 | 0.41 | 1.49 | 3.01 | 0.01 | 1.93 | 0.04 | 1.93 | 0.09 | 0.10 |
| 184 / 1 . | 55.08 | 0.05 | 2.43 | 0.25 | 9.02 | 17.63 | 12.91 | 0.20 | 0.07 | 97.63 | 7.78 | 0.22 | 0.01 | 0.19 | 1.07 | 3.71 | 0.00 | 1.95 | 0.03 | 1.95 | 0.03 | 0.01 |
| 191 / 1 . | 55.22 | 0.03 | 1.81 | 0.25 | 11.14 | 16.79 | 12.83 | 0.14 | 0.06 | 98.26 | 7.83 | 0.17 | 0.00 | 0.13 | 1.31 | 3.55 | 0.01 | 1.95 | 0.01 | 1.95 | 0.03 | 0.01 |
| 167 / 1 . | 47.40 | 1.10 | 8.77 | 0.22 | 12.54 | 12.99 | 12.38 | 0.76 | 0.82 | 96.97 | 6.95 | 1.05 | 0.12 | 0.46 | 1.54 | 2.84 | 0.00 | 1.94 | 0.03 | 1.94 | 0.19 | 0.15 |
| 225 / 1 . | 52.77 | 0.18 | 4.35 | 0.23 | 11.29 | 15.61 | 12.65 | 0.31 | 0.32 | 97.72 | 7.56 | 0.44 | 0.02 | 0.29 | 1.35 | 3.33 | 0.01 | 1.94 | 0.02 | 1.94 | 0.06 | 0.06 |
| 221 / 1 . | 54.11 | 0.09 | 2.89 | 0.21 | 11.80 | 15.94 | 12.70 | 0.19 | 0.17 | 98.08 | 7.71 | 0.29 | 0.01 | 0.19 | 1.38 | 3.38 | 0.02 | 1.94 | 0.02 | 1.94 | 0.04 | 0.03 |
| 201 / 1 . | 48.81 | 1.01 | 8.37 | 0.24 | 12.34 | 13.42 | 12.35 | 0.55 | 0.66 | 97.75 | 7.06 | 0.95 | 0.11 | 0.48 | 1.47 | 2.89 | 0.02 | 1.91 | 0.04 | 1.91 | 0.12 | 0.12 |
| 202 / 1 . | 53.48 | 0.15 | 3.53 | 0.24 | 10.71 | 16.01 | 12.70 | 0.20 | 0.19 | 97.21 | 7.65 | 0.35 | 0.02 | 0.24 | 1.28 | 3.41 | 0.00 | 1.95 | 0.03 | 1.95 | 0.02 | 0.04 |

Appendix II.1.2: Monzogabbro (SBNK49)

| **a.n.** | **SiO2** | **TiO2** | **Al2O3** | **MnO** | **FeO** | **MgO** | **CaO** | **Na2O** | **K2O** | **Total** | **SiT** | **AlT** | **TiC** | **AlC** | **FeC** | **MgC** | **FeB** | **CaB** | **NaB** | **CaB** | **NaA** | **KA** |
| --- | --- | --- | --- | --- | --- | --- | --- | --- | --- | --- | --- | --- | --- | --- | --- | --- | --- | --- | --- | --- | --- | --- |
| 13 / 1 . | 43.28 | 1.78 | 12.13 | 0.24 | 15.19 | 11.07 | 11.42 | 1.28 | 0.75 | 97.16 | 6.46 | 1.54 | 0.20 | 0.59 | 1.74 | 2.46 | 0.16 | 1.81 | 0.00 | 1.83 | 0.37 | 0.14 |
| 14 / 1 . | 45.34 | 1.01 | 11.19 | 0.28 | 14.24 | 11.56 | 11.76 | 1.16 | 0.39 | 96.93 | 6.71 | 1.29 | 0.11 | 0.66 | 1.67 | 2.55 | 0.09 | 1.87 | 0.01 | 1.87 | 0.33 | 0.07 |
| 16 / 1 . | 44.59 | 1.21 | 11.18 | 0.24 | 14.62 | 11.57 | 11.50 | 1.14 | 0.52 | 96.58 | 6.65 | 1.35 | 0.14 | 0.61 | 1.68 | 2.57 | 0.15 | 1.82 | 0.00 | 1.84 | 0.33 | 0.10 |
| 102 / 1 . | 42.86 | 1.88 | 12.82 | 0.19 | 15.52 | 10.52 | 11.63 | 1.27 | 0.82 | 97.50 | 6.39 | 1.61 | 0.21 | 0.64 | 1.80 | 2.34 | 0.13 | 1.85 | 0.00 | 1.86 | 0.37 | 0.16 |
| 103 / 1 . | 43.32 | 1.83 | 12.32 | 0.27 | 14.91 | 10.90 | 11.65 | 1.16 | 0.71 | 97.05 | 6.46 | 1.54 | 0.21 | 0.63 | 1.74 | 2.42 | 0.12 | 1.85 | 0.00 | 1.86 | 0.34 | 0.13 |
| 104 / 1 . | 43.33 | 1.77 | 12.18 | 0.26 | 15.18 | 10.96 | 11.33 | 1.41 | 0.88 | 97.30 | 6.46 | 1.54 | 0.20 | 0.60 | 1.76 | 2.44 | 0.14 | 1.81 | 0.02 | 1.81 | 0.39 | 0.17 |
| 105 / 1 . | 46.88 | 1.05 | 10.26 | 0.21 | 12.87 | 12.73 | 11.82 | 1.08 | 0.37 | 97.26 | 6.85 | 1.15 | 0.12 | 0.62 | 1.49 | 2.77 | 0.08 | 1.85 | 0.04 | 1.85 | 0.27 | 0.07 |
| 26 / 1 . | 44.19 | 2.00 | 10.58 | 0.27 | 15.87 | 10.75 | 11.62 | 1.11 | 0.71 | 97.09 | 6.61 | 1.38 | 0.23 | 0.48 | 1.89 | 2.40 | 0.10 | 1.86 | 0.01 | 1.86 | 0.32 | 0.14 |
| 27 / 1 . | 42.67 | 2.31 | 12.36 | 0.22 | 15.31 | 10.77 | 11.46 | 1.27 | 0.79 | 97.18 | 6.38 | 1.62 | 0.26 | 0.56 | 1.77 | 2.40 | 0.14 | 1.83 | 0.00 | 1.84 | 0.37 | 0.15 |
| 28 / 1 . | 47.88 | 0.83 | 10.73 | 0.24 | 14.16 | 11.54 | 11.59 | 1.20 | 0.32 | 98.50 | 6.92 | 1.08 | 0.09 | 0.75 | 1.67 | 2.49 | 0.05 | 1.80 | 0.13 | 1.80 | 0.21 | 0.06 |
| 54 / 1 . | 46.23 | 0.98 | 9.90 | 0.27 | 14.45 | 12.24 | 11.59 | 1.18 | 0.40 | 97.24 | 6.82 | 1.18 | 0.11 | 0.55 | 1.65 | 2.69 | 0.13 | 1.83 | 0.00 | 1.83 | 0.33 | 0.08 |
| 53 / 1 . | 48.89 | 0.43 | 8.22 | 0.23 | 13.01 | 13.53 | 11.79 | 0.95 | 0.21 | 97.26 | 7.12 | 0.88 | 0.05 | 0.54 | 1.49 | 2.94 | 0.10 | 1.84 | 0.03 | 1.84 | 0.24 | 0.04 |
| 69 / 1 . | 45.43 | 1.40 | 10.65 | 0.26 | 14.90 | 11.78 | 11.61 | 1.15 | 0.49 | 97.68 | 6.70 | 1.30 | 0.16 | 0.55 | 1.70 | 2.59 | 0.14 | 1.83 | 0.00 | 1.83 | 0.33 | 0.09 |
| 68 / 1 . | 44.64 | 1.43 | 11.46 | 0.24 | 15.30 | 11.15 | 11.45 | 1.19 | 0.55 | 97.40 | 6.62 | 1.38 | 0.16 | 0.62 | 1.75 | 2.46 | 0.14 | 1.82 | 0.01 | 1.82 | 0.33 | 0.10 |
| 67 / 1 . | 50.39 | 0.47 | 6.95 | 0.18 | 12.82 | 14.25 | 11.95 | 0.73 | 0.12 | 97.87 | 7.26 | 0.74 | 0.05 | 0.45 | 1.44 | 3.06 | 0.11 | 1.85 | 0.02 | 1.85 | 0.18 | 0.02 |
| 79 / 1 . | 47.70 | 0.57 | 8.73 | 0.26 | 14.05 | 13.02 | 11.80 | 1.01 | 0.29 | 97.41 | 6.99 | 1.01 | 0.06 | 0.50 | 1.59 | 2.84 | 0.13 | 1.84 | 0.00 | 1.85 | 0.29 | 0.05 |
| 78 / 1 . | 51.79 | 0.13 | 4.18 | 0.14 | 13.43 | 14.18 | 12.49 | 0.38 | 0.19 | 96.89 | 7.56 | 0.44 | 0.01 | 0.28 | 1.62 | 3.09 | 0.02 | 1.95 | 0.01 | 1.95 | 0.10 | 0.04 |
| 77 / 1 . | 52.00 | 0.25 | 4.76 | 0.21 | 11.86 | 15.39 | 12.35 | 0.50 | 0.06 | 97.39 | 7.49 | 0.51 | 0.03 | 0.30 | 1.36 | 3.31 | 0.07 | 1.91 | 0.00 | 1.91 | 0.14 | 0.01 |
| 63 / 1 . | 43.72 | 1.60 | 11.46 | 0.25 | 15.12 | 11.04 | 11.84 | 1.07 | 0.64 | 96.74 | 6.55 | 1.45 | 0.18 | 0.57 | 1.78 | 2.46 | 0.11 | 1.86 | 0.00 | 1.90 | 0.31 | 0.12 |
| 64 / 1 . | 45.31 | 1.32 | 10.56 | 0.32 | 14.88 | 11.84 | 11.30 | 1.13 | 0.52 | 97.19 | 6.71 | 1.29 | 0.15 | 0.56 | 1.67 | 2.62 | 0.17 | 1.79 | 0.00 | 1.79 | 0.33 | 0.10 |
| 65 / 1 . | 47.98 | 0.75 | 8.40 | 0.27 | 14.19 | 13.69 | 11.41 | 1.05 | 0.33 | 98.06 | 6.99 | 1.01 | 0.08 | 0.43 | 1.51 | 2.97 | 0.22 | 1.75 | 0.00 | 1.78 | 0.30 | 0.06 |
| 35 / 1 . | 46.96 | 0.57 | 9.90 | 0.23 | 14.13 | 12.19 | 11.84 | 1.08 | 0.31 | 97.22 | 6.90 | 1.10 | 0.06 | 0.62 | 1.64 | 2.67 | 0.09 | 1.87 | 0.01 | 1.87 | 0.30 | 0.06 |
| 34 / 1 . | 47.57 | 1.03 | 8.72 | 0.29 | 14.16 | 13.02 | 11.41 | 1.10 | 0.40 | 97.69 | 6.96 | 1.04 | 0.11 | 0.46 | 1.58 | 2.84 | 0.16 | 1.79 | 0.02 | 1.79 | 0.29 | 0.08 |
| 97 / 1 . | 45.31 | 1.37 | 11.89 | 0.28 | 15.83 | 10.59 | 11.53 | 1.37 | 0.62 | 98.79 | 6.63 | 1.37 | 0.15 | 0.69 | 1.85 | 2.31 | 0.09 | 1.81 | 0.07 | 1.81 | 0.32 | 0.12 |
| 96 / 1 . | 44.92 | 1.53 | 10.52 | 0.24 | 14.57 | 11.80 | 11.82 | 1.10 | 0.52 | 97.02 | 6.67 | 1.32 | 0.17 | 0.52 | 1.70 | 2.61 | 0.11 | 1.86 | 0.00 | 1.88 | 0.32 | 0.10 |
| 95 / 1 . | 53.95 | 0.13 | 3.47 | 0.19 | 11.15 | 16.49 | 12.20 | 0.32 | 0.03 | 97.94 | 7.67 | 0.33 | 0.01 | 0.26 | 1.23 | 3.50 | 0.09 | 1.86 | 0.03 | 1.86 | 0.06 | 0.01 |
| 40 / 1 . | 45.65 | 0.96 | 10.22 | 0.28 | 14.98 | 12.08 | 11.44 | 1.17 | 0.46 | 97.25 | 6.76 | 1.24 | 0.11 | 0.54 | 1.68 | 2.67 | 0.18 | 1.78 | 0.00 | 1.81 | 0.34 | 0.09 |
| 39/ 1 . | 52.81 | 0.27 | 6.64 | 0.19 | 11.46 | 14.09 | 11.93 | 1.13 | 0.12 | 98.66 | 7.46 | 0.54 | 0.03 | 0.57 | 1.36 | 2.97 | 0.00 | 1.81 | 0.19 | 1.81 | 0.12 | 0.02 |
| 6 / 1 . | 47.14 | 0.77 | 9.24 | 0.26 | 13.90 | 12.81 | 11.83 | 1.06 | 0.30 | 97.33 | 6.92 | 1.08 | 0.09 | 0.52 | 1.59 | 2.80 | 0.12 | 1.85 | 0.00 | 1.86 | 0.30 | 0.06 |

Appendix II.1.3: Granodiorites (SGL32, SDIA4, SBGS54)

| **a.n.** | **SiO2** | **TiO2** | **Al2O3** | **MnO** | **FeO** | **MgO** | **CaO** | **Na2O** | **K2O** | **Total** | **SiT** | **AlT** | **TiC** | **AlC** | **FeC** | **MgC** | **FeB** | **CaB** | **NaB** | **CaB** | **NaA** | **KA** |
| --- | --- | --- | --- | --- | --- | --- | --- | --- | --- | --- | --- | --- | --- | --- | --- | --- | --- | --- | --- | --- | --- | --- |
| 202 / 1 . | 45.60 | 0.66 | 10.75 | 0.38 | 19.10 | 8.04 | 11.23 | 0.81 | 0.38 | 96.94 | 6.87 | 1.13 | 0.08 | 0.78 | 2.33 | 1.81 | 0.08 | 1.81 | 0.06 | 1.81 | 0.18 | 0.07 |
| 201 / 1 . | 45.40 | 1.17 | 9.88 | 0.42 | 19.53 | 8.00 | 10.68 | 0.89 | 0.62 | 96.59 | 6.90 | 1.10 | 0.13 | 0.67 | 2.39 | 1.81 | 0.10 | 1.74 | 0.11 | 1.74 | 0.15 | 0.12 |
| 200 / 1 . | 43.73 | 0.52 | 14.40 | 0.36 | 19.65 | 6.51 | 10.94 | 1.11 | 0.52 | 97.75 | 6.56 | 1.44 | 0.06 | 1.11 | 2.38 | 1.46 | 0.09 | 1.76 | 0.11 | 1.76 | 0.22 | 0.10 |
| 206 / 1 . | 45.44 | 1.63 | 10.03 | 0.39 | 19.54 | 8.07 | 10.96 | 0.86 | 0.73 | 97.64 | 6.84 | 1.16 | 0.18 | 0.62 | 2.39 | 1.81 | 0.07 | 1.77 | 0.11 | 1.77 | 0.14 | 0.14 |
| 205 / 1 . | 46.75 | 1.30 | 8.93 | 0.37 | 19.23 | 8.41 | 11.33 | 0.73 | 0.60 | 97.64 | 7.01 | 0.99 | 0.15 | 0.59 | 2.39 | 1.88 | 0.02 | 1.82 | 0.11 | 1.82 | 0.10 | 0.11 |
| 204 / 1 . | 46.28 | 0.80 | 10.34 | 0.43 | 19.12 | 8.28 | 10.89 | 0.92 | 0.35 | 97.42 | 6.93 | 1.07 | 0.09 | 0.76 | 2.30 | 1.85 | 0.10 | 1.75 | 0.10 | 1.75 | 0.16 | 0.07 |
| 227 / 1 . | 46.31 | 0.92 | 9.85 | 0.50 | 20.43 | 8.41 | 9.78 | 0.84 | 0.46 | 97.49 | 6.96 | 1.04 | 0.10 | 0.70 | 2.31 | 1.88 | 0.26 | 1.58 | 0.10 | 1.58 | 0.14 | 0.09 |
| 214 / 1 . | 45.89 | 1.06 | 9.35 | 0.35 | 20.16 | 8.43 | 10.64 | 0.81 | 0.41 | 97.11 | 6.94 | 1.06 | 0.12 | 0.60 | 2.37 | 1.90 | 0.18 | 1.72 | 0.05 | 1.72 | 0.19 | 0.08 |
| 215 / 1 . | 44.56 | 0.54 | 12.25 | 0.38 | 19.48 | 7.63 | 11.06 | 1.00 | 0.40 | 97.30 | 6.71 | 1.29 | 0.06 | 0.89 | 2.34 | 1.71 | 0.12 | 1.79 | 0.05 | 1.79 | 0.24 | 0.08 |
| 178 / 1 . | 42.96 | 0.35 | 16.11 | 0.26 | 19.61 | 5.62 | 11.43 | 0.98 | 0.50 | 97.82 | 6.44 | 1.56 | 0.04 | 1.29 | 2.42 | 1.26 | 0.04 | 1.84 | 0.09 | 1.84 | 0.19 | 0.10 |
| 177 / 1 . | 42.20 | 0.42 | 15.92 | 0.28 | 19.46 | 5.92 | 11.46 | 0.98 | 0.54 | 97.18 | 6.38 | 1.62 | 0.05 | 1.22 | 2.40 | 1.33 | 0.06 | 1.86 | 0.05 | 1.86 | 0.24 | 0.11 |
| 180 / 1 . | 46.45 | 0.95 | 10.00 | 0.32 | 18.60 | 8.37 | 10.95 | 0.93 | 0.38 | 96.96 | 6.97 | 1.03 | 0.11 | 0.74 | 2.27 | 1.87 | 0.06 | 1.76 | 0.14 | 1.76 | 0.13 | 0.07 |
| 3 / 1 . | 49.94 | 0.64 | 5.29 | 0.35 | 15.84 | 12.17 | 11.77 | 0.77 | 0.51 | 97.27 | 7.38 | 0.62 | 0.07 | 0.30 | 1.94 | 2.68 | 0.02 | 1.86 | 0.07 | 1.86 | 0.15 | 0.10 |
| 2 / 1 . | 49.62 | 0.53 | 5.21 | 0.38 | 15.89 | 12.48 | 11.88 | 0.59 | 0.43 | 97.02 | 7.36 | 0.64 | 0.06 | 0.27 | 1.91 | 2.76 | 0.07 | 1.89 | 0.00 | 1.89 | 0.17 | 0.08 |
| 1 / 1 . | 49.91 | 0.52 | 5.30 | 0.39 | 15.94 | 12.31 | 11.81 | 0.68 | 0.45 | 97.30 | 7.37 | 0.63 | 0.06 | 0.30 | 1.92 | 2.71 | 0.05 | 1.87 | 0.04 | 1.87 | 0.16 | 0.08 |
| 51 / 1 . | 51.86 | 0.27 | 4.06 | 0.33 | 15.00 | 13.20 | 12.21 | 0.51 | 0.29 | 97.73 | 7.57 | 0.43 | 0.03 | 0.27 | 1.83 | 2.87 | 0.00 | 1.91 | 0.05 | 1.91 | 0.09 | 0.06 |
| 52 / 1 . | 49.58 | 0.59 | 5.68 | 0.37 | 16.15 | 12.08 | 11.99 | 0.62 | 0.50 | 97.56 | 7.32 | 0.68 | 0.07 | 0.31 | 1.96 | 2.66 | 0.04 | 1.90 | 0.02 | 1.90 | 0.16 | 0.10 |
| 53 / 1 . | 51.57 | 0.32 | 3.48 | 0.36 | 15.34 | 12.99 | 12.30 | 0.37 | 0.30 | 97.02 | 7.60 | 0.40 | 0.04 | 0.21 | 1.89 | 2.85 | 0.00 | 1.94 | 0.02 | 1.94 | 0.08 | 0.06 |
| 47 / 1 . | 49.46 | 0.66 | 5.67 | 0.41 | 15.96 | 11.93 | 11.94 | 0.76 | 0.51 | 97.30 | 7.32 | 0.68 | 0.07 | 0.31 | 1.98 | 2.63 | 0.00 | 1.89 | 0.05 | 1.89 | 0.17 | 0.10 |
| 46 / 1 . | 50.53 | 0.40 | 4.77 | 0.35 | 15.45 | 12.56 | 12.04 | 0.48 | 0.39 | 96.99 | 7.46 | 0.54 | 0.05 | 0.29 | 1.89 | 2.77 | 0.02 | 1.91 | 0.03 | 1.91 | 0.11 | 0.07 |
| 50 / 1 . | 52.01 | 0.18 | 3.01 | 0.38 | 14.89 | 13.78 | 12.18 | 0.39 | 0.23 | 97.04 | 7.64 | 0.36 | 0.02 | 0.16 | 1.79 | 3.02 | 0.04 | 1.92 | 0.00 | 1.92 | 0.11 | 0.04 |
| 49 / 1 . | 52.20 | 0.17 | 3.18 | 0.38 | 15.13 | 13.64 | 12.22 | 0.49 | 0.21 | 97.61 | 7.63 | 0.37 | 0.02 | 0.18 | 1.82 | 2.97 | 0.03 | 1.91 | 0.01 | 1.91 | 0.13 | 0.04 |
| 48 / 1 . | 52.77 | 0.19 | 2.90 | 0.34 | 14.61 | 13.80 | 12.25 | 0.31 | 0.21 | 97.38 | 7.70 | 0.30 | 0.02 | 0.20 | 1.78 | 3.00 | 0.01 | 1.92 | 0.04 | 1.92 | 0.05 | 0.04 |
| 30 / 1 . | 49.30 | 0.65 | 5.98 | 0.40 | 16.09 | 11.96 | 11.85 | 0.77 | 0.55 | 97.56 | 7.28 | 0.71 | 0.07 | 0.33 | 1.96 | 2.63 | 0.03 | 1.88 | 0.05 | 1.88 | 0.18 | 0.10 |
| 29 / 1 . | 49.87 | 0.46 | 5.05 | 0.41 | 16.01 | 12.64 | 11.89 | 0.66 | 0.48 | 97.47 | 7.37 | 0.63 | 0.05 | 0.25 | 1.91 | 2.78 | 0.07 | 1.88 | 0.00 | 1.88 | 0.19 | 0.09 |
| 13 / 1 . | 50.48 | 0.38 | 4.33 | 0.42 | 15.10 | 12.97 | 11.89 | 0.55 | 0.42 | 96.54 | 7.48 | 0.51 | 0.04 | 0.24 | 1.84 | 2.87 | 0.03 | 1.89 | 0.03 | 1.89 | 0.13 | 0.08 |
| 97 / 1 . | 49.72 | 0.25 | 5.18 | 0.42 | 17.59 | 11.04 | 12.03 | 0.47 | 0.45 | 97.14 | 7.41 | 0.59 | 0.03 | 0.32 | 2.18 | 2.45 | 0.01 | 1.92 | 0.01 | 1.92 | 0.12 | 0.09 |
| 96 / 1 . | 50.54 | 0.12 | 4.13 | 0.38 | 17.32 | 12.00 | 12.16 | 0.49 | 0.28 | 97.42 | 7.50 | 0.50 | 0.01 | 0.22 | 2.10 | 2.65 | 0.04 | 1.91 | 0.00 | 1.93 | 0.14 | 0.05 |
| 99 / 1 . | 46.43 | 0.40 | 8.33 | 0.35 | 18.28 | 9.64 | 11.88 | 0.84 | 0.83 | 96.98 | 7.01 | 0.99 | 0.05 | 0.49 | 2.28 | 2.17 | 0.03 | 1.92 | 0.01 | 1.92 | 0.24 | 0.16 |
| 98 / 1 . | 48.20 | 0.30 | 6.31 | 0.39 | 17.93 | 10.63 | 12.00 | 0.80 | 0.61 | 97.16 | 7.23 | 0.77 | 0.03 | 0.35 | 2.23 | 2.38 | 0.02 | 1.93 | 0.00 | 1.93 | 0.23 | 0.12 |
| 100 / 1 . | 48.83 | 0.33 | 5.72 | 0.41 | 17.77 | 10.88 | 12.03 | 0.69 | 0.56 | 97.23 | 7.31 | 0.69 | 0.04 | 0.31 | 2.21 | 2.43 | 0.01 | 1.93 | 0.01 | 1.93 | 0.20 | 0.11 |
| 101 / 1 . | 48.65 | 0.33 | 6.02 | 0.42 | 17.89 | 10.54 | 11.97 | 0.70 | 0.61 | 97.12 | 7.29 | 0.71 | 0.04 | 0.36 | 2.24 | 2.36 | 0.00 | 1.92 | 0.03 | 1.92 | 0.18 | 0.12 |
| 103 / 1 . | 48.08 | 0.31 | 6.74 | 0.40 | 18.07 | 10.38 | 11.93 | 0.72 | 0.63 | 97.27 | 7.21 | 0.80 | 0.04 | 0.40 | 2.24 | 2.32 | 0.03 | 1.92 | 0.01 | 1.92 | 0.20 | 0.12 |
| 102 / 1 . | 49.55 | 0.15 | 5.22 | 0.37 | 17.75 | 10.96 | 12.07 | 0.53 | 0.40 | 97.00 | 7.41 | 0.59 | 0.02 | 0.33 | 2.20 | 2.44 | 0.02 | 1.93 | 0.01 | 1.93 | 0.15 | 0.08 |
| 67 / 1 . | 49.70 | 0.23 | 5.02 | 0.37 | 16.93 | 11.64 | 12.15 | 0.57 | 0.42 | 97.02 | 7.41 | 0.59 | 0.03 | 0.29 | 2.10 | 2.59 | 0.01 | 1.94 | 0.00 | 1.94 | 0.17 | 0.08 |
| 87 / 1 . | 48.41 | 0.34 | 6.11 | 0.43 | 17.93 | 10.56 | 11.94 | 0.66 | 0.69 | 97.07 | 7.27 | 0.73 | 0.04 | 0.35 | 2.24 | 2.36 | 0.01 | 1.92 | 0.01 | 1.92 | 0.18 | 0.13 |
| 88 / 1 . | 49.46 | 0.27 | 5.42 | 0.41 | 17.88 | 11.05 | 11.97 | 0.58 | 0.53 | 97.57 | 7.36 | 0.64 | 0.03 | 0.31 | 2.19 | 2.45 | 0.03 | 1.91 | 0.01 | 1.91 | 0.16 | 0.10 |
| 74 / 1 . | 48.39 | 0.41 | 6.32 | 0.41 | 17.84 | 10.68 | 11.93 | 0.68 | 0.66 | 97.30 | 7.24 | 0.76 | 0.05 | 0.36 | 2.20 | 2.38 | 0.03 | 1.91 | 0.01 | 1.91 | 0.19 | 0.13 |

Appendix II.1.4: Quartz microdiorite (SSSK50)

| **a.n.** | **SiO2** | **TiO2** | **Al2O3** | **MnO** | **FeO** | **MgO** | **CaO** | **Na2O** | **K2O** | **Total** | **SiT** | **AlT** | **TiC** | **AlC** | **FeC** | **MgC** | **FeB** | **CaB** | **NaB** | **CaB** | **NaA** | **KA** |
| --- | --- | --- | --- | --- | --- | --- | --- | --- | --- | --- | --- | --- | --- | --- | --- | --- | --- | --- | --- | --- | --- | --- |
| 98 / 1 . | 48.20 | 0.30 | 6.31 | 0.39 | 17.93 | 10.63 | 12.00 | 0.80 | 0.61 | 97.16 | 7.23 | 0.77 | 0.03 | 0.35 | 2.23 | 2.38 | 0.02 | 1.93 | 0.00 | 1.93 | 0.23 | 0.12 |
| 100 / 1 . | 48.83 | 0.33 | 5.72 | 0.41 | 17.77 | 10.88 | 12.03 | 0.69 | 0.56 | 97.23 | 7.31 | 0.69 | 0.04 | 0.31 | 2.21 | 2.43 | 0.01 | 1.93 | 0.01 | 1.93 | 0.20 | 0.11 |
| 101 / 1 . | 48.65 | 0.33 | 6.02 | 0.42 | 17.89 | 10.54 | 11.97 | 0.70 | 0.61 | 97.12 | 7.29 | 0.71 | 0.04 | 0.36 | 2.24 | 2.36 | 0.00 | 1.92 | 0.03 | 1.92 | 0.18 | 0.12 |
| 103 / 1 . | 48.08 | 0.31 | 6.74 | 0.40 | 18.07 | 10.38 | 11.93 | 0.72 | 0.63 | 97.27 | 7.21 | 0.80 | 0.04 | 0.40 | 2.24 | 2.32 | 0.03 | 1.92 | 0.01 | 1.92 | 0.20 | 0.12 |
| 102 / 1 . | 49.55 | 0.15 | 5.22 | 0.37 | 17.75 | 10.96 | 12.07 | 0.53 | 0.40 | 97.00 | 7.41 | 0.59 | 0.02 | 0.33 | 2.20 | 2.44 | 0.02 | 1.93 | 0.01 | 1.93 | 0.15 | 0.08 |
| 67 / 1 . | 49.70 | 0.23 | 5.02 | 0.37 | 16.93 | 11.64 | 12.15 | 0.57 | 0.42 | 97.02 | 7.41 | 0.59 | 0.03 | 0.29 | 2.10 | 2.59 | 0.01 | 1.94 | 0.00 | 1.94 | 0.17 | 0.08 |
| 87 / 1 . | 48.41 | 0.34 | 6.11 | 0.43 | 17.93 | 10.56 | 11.94 | 0.66 | 0.69 | 97.07 | 7.27 | 0.73 | 0.04 | 0.35 | 2.24 | 2.36 | 0.01 | 1.92 | 0.01 | 1.92 | 0.18 | 0.13 |
| 88 / 1 . | 49.46 | 0.27 | 5.42 | 0.41 | 17.88 | 11.05 | 11.97 | 0.58 | 0.53 | 97.57 | 7.36 | 0.64 | 0.03 | 0.31 | 2.19 | 2.45 | 0.03 | 1.91 | 0.01 | 1.91 | 0.16 | 0.10 |
| 74 / 1 . | 48.39 | 0.41 | 6.32 | 0.41 | 17.84 | 10.68 | 11.93 | 0.68 | 0.66 | 97.30 | 7.24 | 0.76 | 0.05 | 0.36 | 2.20 | 2.38 | 0.03 | 1.91 | 0.01 | 1.91 | 0.19 | 0.13 |
| 118 / 1 . | 49.37 | 0.55 | 6.12 | 0.36 | 13.69 | 14.03 | 12.01 | 0.81 | 0.57 | 97.51 | 7.22 | 0.78 | 0.06 | 0.27 | 1.59 | 3.06 | 0.09 | 1.87 | 0.00 | 1.88 | 0.23 | 0.11 |
| 119 / 1 . | 50.96 | 0.22 | 5.20 | 0.32 | 12.36 | 14.82 | 12.26 | 0.68 | 0.44 | 97.25 | 7.39 | 0.61 | 0.02 | 0.28 | 1.46 | 3.21 | 0.04 | 1.91 | 0.02 | 1.91 | 0.18 | 0.08 |
| 126 / 1 . | 49.36 | 0.75 | 6.36 | 0.33 | 13.27 | 14.11 | 12.14 | 0.92 | 0.68 | 97.92 | 7.18 | 0.81 | 0.08 | 0.28 | 1.56 | 3.06 | 0.05 | 1.89 | 0.01 | 1.89 | 0.25 | 0.13 |
| 127 / 1 . | 49.62 | 0.26 | 5.91 | 0.31 | 13.27 | 14.15 | 12.16 | 0.76 | 0.48 | 96.92 | 7.27 | 0.72 | 0.03 | 0.30 | 1.55 | 3.09 | 0.07 | 1.89 | 0.00 | 1.91 | 0.22 | 0.09 |
| 130 / 1 . | 48.83 | 0.48 | 6.52 | 0.38 | 13.23 | 13.89 | 12.16 | 0.90 | 0.57 | 96.95 | 7.19 | 0.81 | 0.05 | 0.32 | 1.58 | 3.05 | 0.05 | 1.91 | 0.00 | 1.92 | 0.26 | 0.11 |
| 131 / 1 . | 48.49 | 0.35 | 6.78 | 0.37 | 13.51 | 13.63 | 12.13 | 0.76 | 0.66 | 96.69 | 7.16 | 0.84 | 0.04 | 0.34 | 1.60 | 3.00 | 0.07 | 1.89 | 0.00 | 1.92 | 0.22 | 0.13 |
| 133 / 1 . | 49.19 | 0.67 | 6.28 | 0.30 | 13.42 | 13.97 | 12.08 | 0.90 | 0.67 | 97.48 | 7.20 | 0.80 | 0.07 | 0.29 | 1.59 | 3.05 | 0.06 | 1.89 | 0.01 | 1.89 | 0.24 | 0.13 |
| 132 / 1 . | 53.64 | 0.07 | 3.01 | 0.32 | 11.35 | 16.26 | 12.38 | 0.40 | 0.17 | 97.59 | 7.69 | 0.31 | 0.01 | 0.19 | 1.32 | 3.47 | 0.04 | 1.90 | 0.02 | 1.90 | 0.09 | 0.03 |
| 135 / 1 . | 49.61 | 0.47 | 6.02 | 0.33 | 12.99 | 14.30 | 12.05 | 0.69 | 0.53 | 96.99 | 7.27 | 0.73 | 0.05 | 0.31 | 1.51 | 3.13 | 0.08 | 1.88 | 0.00 | 1.89 | 0.20 | 0.10 |
| 134 / 1 . | 51.36 | 0.26 | 4.59 | 0.36 | 11.87 | 15.39 | 12.29 | 0.61 | 0.38 | 97.11 | 7.46 | 0.54 | 0.03 | 0.24 | 1.40 | 3.33 | 0.05 | 1.91 | 0.00 | 1.91 | 0.17 | 0.07 |
| 147 / 1 . | 48.80 | 0.45 | 6.64 | 0.35 | 13.47 | 14.05 | 12.02 | 0.91 | 0.65 | 97.33 | 7.16 | 0.84 | 0.05 | 0.31 | 1.56 | 3.07 | 0.09 | 1.86 | 0.00 | 1.89 | 0.26 | 0.12 |
| 148 / 1 . | 50.49 | 0.47 | 5.38 | 0.34 | 13.07 | 14.44 | 12.08 | 0.82 | 0.48 | 97.56 | 7.34 | 0.66 | 0.05 | 0.27 | 1.53 | 3.13 | 0.06 | 1.88 | 0.02 | 1.88 | 0.21 | 0.09 |
| 148 / 1 . | 48.35 | 0.44 | 6.84 | 0.32 | 13.46 | 13.56 | 12.03 | 0.86 | 0.67 | 96.53 | 7.15 | 0.85 | 0.05 | 0.34 | 1.60 | 2.99 | 0.06 | 1.90 | 0.00 | 1.91 | 0.25 | 0.13 |
| 149 / 1 . | 47.87 | 0.69 | 7.28 | 0.36 | 13.94 | 13.02 | 12.01 | 0.90 | 0.71 | 96.78 | 7.08 | 0.92 | 0.08 | 0.35 | 1.67 | 2.87 | 0.05 | 1.90 | 0.00 | 1.90 | 0.26 | 0.14 |
| 151 / 1 . | 49.32 | 0.47 | 6.74 | 0.33 | 13.49 | 14.05 | 12.21 | 0.85 | 0.63 | 98.09 | 7.17 | 0.83 | 0.05 | 0.33 | 1.57 | 3.04 | 0.07 | 1.89 | 0.00 | 1.90 | 0.24 | 0.12 |
| 150 / 1 . | 47.99 | 0.49 | 7.57 | 0.32 | 14.24 | 13.25 | 11.96 | 1.00 | 0.74 | 97.55 | 7.05 | 0.95 | 0.05 | 0.36 | 1.65 | 2.90 | 0.10 | 1.87 | 0.00 | 1.88 | 0.29 | 0.14 |
| 157 / 1 . | 50.12 | 0.51 | 5.85 | 0.32 | 12.75 | 14.61 | 12.22 | 0.82 | 0.50 | 97.71 | 7.28 | 0.72 | 0.06 | 0.28 | 1.49 | 3.16 | 0.06 | 1.90 | 0.01 | 1.90 | 0.23 | 0.09 |
| 158 / 1 . | 49.01 | 0.61 | 6.61 | 0.36 | 13.44 | 13.83 | 12.05 | 0.92 | 0.70 | 97.54 | 7.17 | 0.83 | 0.07 | 0.31 | 1.59 | 3.02 | 0.05 | 1.89 | 0.01 | 1.89 | 0.25 | 0.13 |
| 160 / 1 . | 48.62 | 0.58 | 6.87 | 0.32 | 13.81 | 13.68 | 12.08 | 0.99 | 0.67 | 97.61 | 7.12 | 0.88 | 0.06 | 0.31 | 1.62 | 2.99 | 0.07 | 1.89 | 0.00 | 1.90 | 0.28 | 0.13 |
| 159 / 1 . | 48.26 | 0.31 | 7.55 | 0.36 | 14.00 | 13.33 | 12.06 | 0.84 | 0.76 | 97.46 | 7.08 | 0.91 | 0.03 | 0.39 | 1.64 | 2.92 | 0.08 | 1.87 | 0.00 | 1.90 | 0.24 | 0.14 |
| 161 / 1 . | 48.43 | 0.55 | 7.06 | 0.37 | 13.78 | 13.60 | 12.02 | 0.95 | 0.71 | 97.47 | 7.11 | 0.89 | 0.06 | 0.33 | 1.62 | 2.98 | 0.07 | 1.88 | 0.00 | 1.89 | 0.27 | 0.13 |
| 162 / 1 . | 48.62 | 0.35 | 6.75 | 0.31 | 13.41 | 13.76 | 12.07 | 0.83 | 0.68 | 96.78 | 7.17 | 0.83 | 0.04 | 0.34 | 1.58 | 3.02 | 0.07 | 1.89 | 0.00 | 1.91 | 0.24 | 0.13 |
| 164 / 1 . | 47.08 | 0.84 | 7.68 | 0.38 | 14.24 | 13.08 | 11.91 | 0.99 | 0.95 | 97.15 | 6.97 | 1.03 | 0.09 | 0.31 | 1.68 | 2.89 | 0.08 | 1.87 | 0.00 | 1.89 | 0.29 | 0.18 |
| 163 / 1 . | 51.19 | 0.17 | 4.38 | 0.35 | 11.87 | 15.60 | 12.42 | 0.59 | 0.33 | 96.92 | 7.44 | 0.55 | 0.02 | 0.20 | 1.39 | 3.38 | 0.06 | 1.90 | 0.00 | 1.94 | 0.17 | 0.06 |
| 113 / 1 . | 48.65 | 0.75 | 6.79 | 0.37 | 13.38 | 13.95 | 12.09 | 0.97 | 0.66 | 97.62 | 7.12 | 0.89 | 0.08 | 0.29 | 1.57 | 3.04 | 0.07 | 1.89 | 0.00 | 1.90 | 0.28 | 0.12 |
| 112 / 1 . | 48.89 | 0.69 | 6.43 | 0.38 | 12.87 | 14.23 | 12.11 | 0.82 | 0.64 | 97.05 | 7.17 | 0.83 | 0.08 | 0.28 | 1.51 | 3.11 | 0.07 | 1.89 | 0.00 | 1.90 | 0.23 | 0.12 |
| 115 / 1 . | 48.87 | 0.63 | 6.81 | 0.30 | 13.43 | 13.76 | 12.04 | 0.76 | 0.68 | 97.28 | 7.17 | 0.83 | 0.07 | 0.35 | 1.58 | 3.01 | 0.07 | 1.89 | 0.00 | 1.89 | 0.22 | 0.13 |
| 114 / 1 . | 48.68 | 0.44 | 6.61 | 0.34 | 13.42 | 13.92 | 12.03 | 0.93 | 0.71 | 97.07 | 7.16 | 0.84 | 0.05 | 0.31 | 1.58 | 3.05 | 0.07 | 1.89 | 0.00 | 1.90 | 0.27 | 0.13 |
| 169 / 1 . | 48.66 | 0.72 | 6.80 | 0.35 | 13.59 | 13.77 | 12.01 | 0.97 | 0.71 | 97.58 | 7.13 | 0.87 | 0.08 | 0.30 | 1.60 | 3.01 | 0.07 | 1.89 | 0.01 | 1.89 | 0.27 | 0.13 |
| 136 / 1 . | 47.66 | 0.82 | 7.50 | 0.37 | 13.58 | 13.24 | 11.93 | 0.93 | 0.81 | 96.84 | 7.05 | 0.95 | 0.09 | 0.36 | 1.62 | 2.92 | 0.06 | 1.89 | 0.01 | 1.89 | 0.26 | 0.15 |
| 111 / 1 . | 48.88 | 0.56 | 6.50 | 0.36 | 13.50 | 14.01 | 12.12 | 0.76 | 0.57 | 97.26 | 7.17 | 0.83 | 0.06 | 0.30 | 1.57 | 3.07 | 0.09 | 1.87 | 0.00 | 1.91 | 0.22 | 0.11 |

Appendix II.1.5: Tonalite (SNKM56)

| **a.n.** | **SiO2** | **TiO2** | **Al2O3** | **MnO** | **FeO** | **MgO** | **CaO** | **Na2O** | **K2O** | **Total** | **SiT** | **AlT** | **TiC** | **AlC** | **FeC** | **MgC** | **FeB** | **CaB** | **NaB** | **CaB** | **NaA** | **KA** |
| --- | --- | --- | --- | --- | --- | --- | --- | --- | --- | --- | --- | --- | --- | --- | --- | --- | --- | --- | --- | --- | --- | --- |
| 27 / 1 . | 46.44 | 0.23 | 6.40 | 0.28 | 19.38 | 10.43 | 11.54 | 1.22 | 1.11 | 97.02 | 7.08 | 0.92 | 0.03 | 0.23 | 2.36 | 2.37 | 0.11 | 1.86 | 0.00 | 1.88 | 0.36 | 0.22 |
| 28 / 1 . | 45.54 | 0.17 | 6.73 | 0.21 | 19.89 | 10.05 | 11.30 | 1.45 | 1.17 | 96.53 | 7.01 | 0.99 | 0.02 | 0.24 | 2.43 | 2.31 | 0.13 | 1.84 | 0.00 | 1.87 | 0.43 | 0.23 |
| 41 / 1 . | 42.92 | 0.50 | 8.66 | 0.19 | 20.92 | 9.13 | 11.30 | 1.59 | 1.60 | 96.82 | 6.67 | 1.32 | 0.06 | 0.26 | 2.56 | 2.12 | 0.16 | 1.81 | 0.00 | 1.88 | 0.48 | 0.32 |
| 40 / 1 . | 47.35 | 0.12 | 5.73 | 0.19 | 18.59 | 10.97 | 11.41 | 1.47 | 1.03 | 96.86 | 7.19 | 0.81 | 0.01 | 0.22 | 2.28 | 2.48 | 0.08 | 1.86 | 0.00 | 1.86 | 0.40 | 0.20 |
| 42 / 1 . | 46.23 | 0.40 | 6.29 | 0.27 | 19.16 | 10.61 | 10.83 | 1.76 | 1.17 | 96.72 | 7.07 | 0.93 | 0.05 | 0.21 | 2.32 | 2.42 | 0.13 | 1.78 | 0.00 | 1.78 | 0.46 | 0.23 |
| 43 / 1 . | 46.48 | 0.15 | 6.65 | 0.27 | 19.17 | 10.41 | 11.32 | 1.55 | 1.23 | 97.23 | 7.07 | 0.93 | 0.02 | 0.26 | 2.35 | 2.36 | 0.09 | 1.85 | 0.00 | 1.85 | 0.42 | 0.24 |
| 35 / 1 . | 45.27 | 0.31 | 7.29 | 0.24 | 19.97 | 10.00 | 11.43 | 1.36 | 1.37 | 97.24 | 6.93 | 1.07 | 0.04 | 0.25 | 2.43 | 2.28 | 0.13 | 1.84 | 0.00 | 1.88 | 0.40 | 0.27 |
| 34 / 1 . | 47.13 | 0.20 | 5.55 | 0.22 | 18.43 | 11.11 | 11.55 | 1.26 | 1.09 | 96.54 | 7.18 | 0.82 | 0.02 | 0.18 | 2.26 | 2.53 | 0.09 | 1.88 | 0.00 | 1.89 | 0.37 | 0.21 |
| 37 / 1 . | 46.50 | 0.23 | 6.25 | 0.24 | 19.34 | 10.56 | 11.46 | 1.38 | 1.14 | 97.09 | 7.09 | 0.91 | 0.03 | 0.21 | 2.36 | 2.40 | 0.10 | 1.87 | 0.00 | 1.87 | 0.41 | 0.22 |
| 38 / 1 . | 49.10 | 0.07 | 4.56 | 0.20 | 17.95 | 11.76 | 11.69 | 0.89 | 0.72 | 96.94 | 7.38 | 0.62 | 0.01 | 0.19 | 2.16 | 2.64 | 0.10 | 1.88 | 0.00 | 1.88 | 0.26 | 0.14 |
| 33 / 1 . | 42.51 | 0.64 | 9.11 | 0.19 | 21.64 | 8.62 | 11.14 | 1.98 | 1.58 | 97.40 | 6.60 | 1.40 | 0.07 | 0.27 | 2.66 | 2.00 | 0.16 | 1.82 | 0.00 | 1.85 | 0.60 | 0.31 |

Appendix II.2: Black micas (XY2-3Z4O10(OH, F, Cl)2)

Appendix II.2.1: Monzogabbro (SBNK49)

| **a.n.** | **SiO2** | **TiO2** | **Al2O3** | **FeO** | **MnO** | **MgO** | **Na2O** | **K2O** | **Total** | **FeO** | **Fe2O3** | **H2O** | **Si** | **AlIV** | **AlVI** | **Ti** | **Fe3+** | **Fe2+** | **Mn** | **Mg** | **Na** | **K** | **OH** | **Fe3+/ΣFe** |
| --- | --- | --- | --- | --- | --- | --- | --- | --- | --- | --- | --- | --- | --- | --- | --- | --- | --- | --- | --- | --- | --- | --- | --- | --- |
| 48 / 1 . | 35.30 | 1.91 | 16.55 | 17.92 | 0.12 | 13.12 | 0.11 | 8.20 | 93.24 | 12.23 | 6.32 | 3.96 | 2.68 | 1.32 | 0.15 | 0.11 | 0.36 | 0.78 | 0.01 | 1.48 | 0.02 | 0.79 | 2.00 | 0.32 |
| 49 / 1 . | 36.56 | 2.12 | 16.32 | 16.75 | 0.11 | 12.62 | 0.08 | 9.92 | 94.48 | 16.64 | 0.11 | 3.94 | 2.78 | 1.22 | 0.25 | 0.12 | 0.01 | 1.06 | 0.01 | 1.43 | 0.01 | 0.96 | 2.00 | 0.01 |
| 1 / 1 . | 37.31 | 2.22 | 16.08 | 17.32 | 0.11 | 12.78 | 0.09 | 10.31 | 96.21 | 17.06 | 0.28 | 4.00 | 2.80 | 1.20 | 0.22 | 0.12 | 0.02 | 1.07 | 0.01 | 1.43 | 0.01 | 0.99 | 2.00 | 0.01 |
| 2 / 1 . | 37.17 | 2.30 | 16.28 | 17.45 | 0.14 | 12.57 | 0.15 | 10.11 | 96.18 | 17.37 | 0.09 | 4.00 | 2.79 | 1.21 | 0.23 | 0.13 | 0.01 | 1.09 | 0.01 | 1.41 | 0.02 | 0.97 | 2.00 | 0.00 |
| 3 / 1 . | 36.76 | 2.09 | 16.31 | 17.77 | 0.12 | 12.55 | 0.08 | 9.90 | 95.57 | 17.15 | 0.68 | 3.98 | 2.77 | 1.23 | 0.22 | 0.12 | 0.04 | 1.08 | 0.01 | 1.41 | 0.01 | 0.95 | 2.00 | 0.03 |
| 36 / 1 . | 36.40 | 2.02 | 16.44 | 17.82 | 0.13 | 13.33 | 0.04 | 8.96 | 95.14 | 13.75 | 4.53 | 4.01 | 2.72 | 1.28 | 0.17 | 0.11 | 0.25 | 0.86 | 0.01 | 1.48 | 0.01 | 0.85 | 2.00 | 0.23 |
| 61 / 1 . | 37.17 | 2.34 | 16.39 | 17.43 | 0.11 | 12.38 | 0.13 | 9.94 | 95.88 | 17.33 | 0.11 | 3.99 | 2.79 | 1.21 | 0.24 | 0.13 | 0.01 | 1.09 | 0.01 | 1.39 | 0.02 | 0.95 | 2.00 | 0.01 |
| 62 / 1 . | 37.09 | 2.55 | 16.30 | 17.67 | 0.13 | 12.28 | 0.11 | 9.72 | 95.84 | 16.88 | 0.87 | 4.00 | 2.78 | 1.22 | 0.22 | 0.14 | 0.05 | 1.06 | 0.01 | 1.37 | 0.02 | 0.93 | 2.00 | 0.04 |
| 73 / 1 . | 36.27 | 2.43 | 15.92 | 19.15 | 0.08 | 11.97 | 0.09 | 8.72 | 94.62 | 15.27 | 4.30 | 3.97 | 2.74 | 1.26 | 0.16 | 0.14 | 0.24 | 0.97 | 0.01 | 1.35 | 0.01 | 0.84 | 2.00 | 0.20 |
| 75 / 1 . | 37.11 | 2.27 | 16.00 | 17.62 | 0.12 | 12.33 | 0.13 | 9.79 | 95.36 | 17.61 | 0.01 | 3.97 | 2.81 | 1.19 | 0.23 | 0.13 | 0.00 | 1.11 | 0.01 | 1.39 | 0.02 | 0.94 | 2.00 | 0.00 |
| 84 / 1 . | 37.29 | 2.44 | 15.95 | 17.55 | 0.11 | 12.66 | 0.17 | 10.04 | 96.21 | 17.26 | 0.33 | 4.00 | 2.79 | 1.21 | 0.20 | 0.14 | 0.02 | 1.08 | 0.01 | 1.41 | 0.02 | 0.96 | 2.00 | 0.02 |
| 85 / 1 . | 37.34 | 2.37 | 15.91 | 17.35 | 0.12 | 12.64 | 0.19 | 10.15 | 96.08 | 17.12 | 0.25 | 4.00 | 2.80 | 1.20 | 0.21 | 0.13 | 0.01 | 1.07 | 0.01 | 1.41 | 0.03 | 0.97 | 2.00 | 0.01 |

Appendix II.2.2: Granodiorite (SSGL32, SDIA4, SBGS54)

| **a.n.** | **SiO2** | **TiO2** | **Al2O3** | **FeO** | **MnO** | **MgO** | **Na2O** | **K2O** | **Total** | **FeO** | **Fe2O3** | **H2O** | **Si** | **AlIV** | **AlVI** | **Ti** | **Fe3+** | **Fe2+** | **Mn** | **Mg** | **Na** | **K** | **OH** | **Fe3+/ΣFe** |
| --- | --- | --- | --- | --- | --- | --- | --- | --- | --- | --- | --- | --- | --- | --- | --- | --- | --- | --- | --- | --- | --- | --- | --- | --- |
| 196 / 1 | 37.03 | 2.02 | 17.91 | 19.74 | 0.09 | 8.89 | 0.07 | 9.21 | 94.97 | 17.66 | 2.31 | 3.96 | 2.80 | 1.20 | 0.40 | 0.11 | 0.13 | 1.12 | 0.01 | 1.00 | 0.01 | 0.89 | 2.00 | 0.11 |
| 195 / 1 | 35.99 | 1.92 | 17.41 | 19.37 | 0.09 | 8.53 | 0.05 | 9.21 | 92.56 | 17.08 | 2.54 | 3.86 | 2.80 | 1.20 | 0.39 | 0.11 | 0.15 | 1.11 | 0.01 | 0.99 | 0.01 | 0.91 | 2.00 | 0.12 |
| 194 / 1 | 36.31 | 1.87 | 18.00 | 19.35 | 0.14 | 8.58 | 0.05 | 9.40 | 93.70 | 16.81 | 2.82 | 3.91 | 2.78 | 1.22 | 0.41 | 0.11 | 0.16 | 1.08 | 0.01 | 0.98 | 0.01 | 0.92 | 2.00 | 0.13 |
| 199 / 1 | 36.73 | 2.13 | 18.10 | 19.70 | 0.10 | 8.39 | 0.01 | 9.39 | 94.54 | 17.27 | 2.70 | 3.95 | 2.79 | 1.21 | 0.41 | 0.12 | 0.15 | 1.10 | 0.01 | 0.95 | 0.00 | 0.91 | 2.00 | 0.12 |
| 198 / 1 | 36.80 | 1.91 | 17.71 | 20.24 | 0.15 | 8.75 | 0.07 | 9.26 | 94.89 | 18.30 | 2.15 | 3.94 | 2.80 | 1.20 | 0.39 | 0.11 | 0.12 | 1.16 | 0.01 | 0.99 | 0.01 | 0.90 | 2.00 | 0.10 |
| 197 / 1 | 36.92 | 2.00 | 18.57 | 19.67 | 0.13 | 8.16 | 0.03 | 9.60 | 95.08 | 16.56 | 3.46 | 3.98 | 2.78 | 1.22 | 0.43 | 0.11 | 0.20 | 1.04 | 0.01 | 0.92 | 0.00 | 0.92 | 2.00 | 0.16 |
| 223 / 1 | 36.44 | 1.78 | 17.91 | 20.35 | 0.13 | 8.21 | 0.06 | 9.32 | 94.20 | 17.90 | 2.73 | 3.92 | 2.79 | 1.21 | 0.41 | 0.10 | 0.16 | 1.15 | 0.01 | 0.94 | 0.01 | 0.91 | 2.00 | 0.12 |
| 225 / 1 | 37.15 | 1.79 | 18.38 | 19.76 | 0.10 | 8.36 | 0.04 | 9.57 | 95.16 | 16.54 | 3.59 | 3.98 | 2.80 | 1.20 | 0.43 | 0.10 | 0.20 | 1.04 | 0.01 | 0.94 | 0.01 | 0.92 | 2.00 | 0.16 |
| 226 / 1 | 37.47 | 1.48 | 18.49 | 19.59 | 0.14 | 8.18 | 0.21 | 8.79 | 94.35 | 15.98 | 4.01 | 3.98 | 2.83 | 1.17 | 0.47 | 0.08 | 0.23 | 1.01 | 0.01 | 0.92 | 0.03 | 0.85 | 2.00 | 0.18 |
|  | 36.54 | 1.89 | 17.51 | 20.44 | 0.12 | 8.50 | 0.07 | 9.05 | 94.12 | 18.62 | 2.03 | 3.91 | 2.80 | 1.20 | 0.39 | 0.11 | 0.12 | 1.19 | 0.01 | 0.97 | 0.01 | 0.89 | 2.00 | 0.09 |
|  | 36.59 | 2.09 | 17.78 | 20.33 | 0.16 | 8.55 | 0.03 | 9.07 | 94.60 | 18.79 | 1.72 | 3.93 | 2.79 | 1.21 | 0.39 | 0.12 | 0.10 | 1.20 | 0.01 | 0.97 | 0.00 | 0.88 | 2.00 | 0.08 |
| 171 / 1 | 37.14 | 2.28 | 18.16 | 19.34 | 0.13 | 8.63 | 0.04 | 9.22 | 94.94 | 17.04 | 2.56 | 3.98 | 2.80 | 1.20 | 0.42 | 0.13 | 0.15 | 1.07 | 0.01 | 0.97 | 0.01 | 0.89 | 2.00 | 0.12 |
| 172 / 1 | 37.00 | 1.83 | 18.38 | 19.20 | 0.12 | 8.39 | 0.01 | 9.59 | 94.52 | 15.80 | 3.78 | 3.97 | 2.80 | 1.20 | 0.44 | 0.10 | 0.22 | 1.00 | 0.01 | 0.95 | 0.00 | 0.92 | 2.00 | 0.18 |
| 174 / 1 | 36.84 | 2.05 | 17.68 | 20.24 | 0.09 | 8.66 | 0.07 | 9.06 | 94.68 | 18.47 | 1.96 | 3.94 | 2.80 | 1.20 | 0.39 | 0.12 | 0.11 | 1.18 | 0.01 | 0.98 | 0.01 | 0.88 | 2.00 | 0.09 |
| 173 / 1 | 36.75 | 2.01 | 17.42 | 19.65 | 0.14 | 9.00 | 0.07 | 9.52 | 94.56 | 17.50 | 2.39 | 3.94 | 2.80 | 1.20 | 0.37 | 0.12 | 0.14 | 1.12 | 0.01 | 1.02 | 0.01 | 0.93 | 2.00 | 0.11 |
| 175 / 1 | 36.69 | 1.59 | 18.51 | 18.78 | 0.13 | 8.73 | 0.01 | 9.24 | 93.69 | 15.74 | 3.38 | 3.94 | 2.79 | 1.21 | 0.45 | 0.09 | 0.19 | 1.00 | 0.01 | 0.99 | 0.00 | 0.90 | 2.00 | 0.16 |
| 176 / 1 | 37.29 | 2.11 | 18.47 | 19.11 | 0.11 | 8.14 | 0.07 | 9.38 | 94.69 | 15.62 | 3.88 | 3.98 | 2.81 | 1.19 | 0.45 | 0.12 | 0.22 | 0.98 | 0.01 | 0.91 | 0.01 | 0.90 | 2.00 | 0.18 |
|  | 36.84 | 2.04 | 17.92 | 20.22 | 0.11 | 8.47 | 0.03 | 9.40 | 95.04 | 17.99 | 2.48 | 3.95 | 2.79 | 1.21 | 0.40 | 0.12 | 0.14 | 1.14 | 0.01 | 0.96 | 0.00 | 0.91 | 2.00 | 0.11 |
|  | 36.97 | 1.82 | 18.06 | 19.97 | 0.14 | 8.45 | 0.05 | 9.23 | 94.67 | 17.37 | 2.88 | 3.95 | 2.80 | 1.20 | 0.42 | 0.10 | 0.16 | 1.10 | 0.01 | 0.96 | 0.01 | 0.89 | 2.00 | 0.13 |
|  | 36.84 | 2.04 | 17.92 | 20.22 | 0.11 | 8.47 | 0.03 | 9.40 | 95.04 | 17.99 | 2.48 | 3.95 | 2.79 | 1.21 | 0.40 | 0.12 | 0.14 | 1.14 | 0.01 | 0.96 | 0.00 | 0.91 | 2.00 | 0.11 |
|  | 36.97 | 1.82 | 18.06 | 19.97 | 0.14 | 8.45 | 0.05 | 9.23 | 94.67 | 17.37 | 2.88 | 3.95 | 2.80 | 1.20 | 0.42 | 0.10 | 0.16 | 1.10 | 0.01 | 0.96 | 0.01 | 0.89 | 2.00 | 0.13 |
| 27 / 1 . | 37.15 | 3.11 | 15.72 | 19.93 | 0.19 | 10.19 | 0.05 | 10.11 | 96.45 | 19.75 | 0.19 | 3.96 | 2.81 | 1.19 | 0.21 | 0.18 | 0.01 | 1.25 | 0.01 | 1.15 | 0.01 | 0.98 | 2.00 | 0.01 |
| 26 / 1 . | 36.76 | 3.18 | 15.65 | 19.74 | 0.24 | 10.13 | 0.04 | 9.91 | 95.66 | 19.44 | 0.33 | 3.93 | 2.80 | 1.20 | 0.21 | 0.18 | 0.02 | 1.24 | 0.02 | 1.15 | 0.01 | 0.96 | 2.00 | 0.01 |
| 25 / 1 . | 37.13 | 3.05 | 15.77 | 19.66 | 0.19 | 10.13 | 0.11 | 10.12 | 96.16 | 19.10 | 0.62 | 3.96 | 2.81 | 1.19 | 0.22 | 0.17 | 0.04 | 1.21 | 0.01 | 1.14 | 0.02 | 0.98 | 2.00 | 0.03 |
| 24 / 1 . | 37.20 | 2.70 | 16.38 | 19.39 | 0.19 | 10.20 | 0.07 | 10.21 | 96.33 | 18.34 | 1.17 | 3.98 | 2.80 | 1.20 | 0.26 | 0.15 | 0.07 | 1.16 | 0.01 | 1.15 | 0.01 | 0.98 | 2.00 | 0.05 |
| 38 / 1 . | 37.21 | 2.41 | 16.33 | 19.92 | 0.21 | 10.30 | 0.09 | 10.08 | 96.54 | 19.07 | 0.95 | 3.98 | 2.80 | 1.20 | 0.25 | 0.14 | 0.05 | 1.20 | 0.01 | 1.16 | 0.01 | 0.97 | 2.00 | 0.04 |
| 37 / 1 . | 37.19 | 2.38 | 16.48 | 19.55 | 0.21 | 10.48 | 0.08 | 10.07 | 96.43 | 18.69 | 0.95 | 3.98 | 2.80 | 1.20 | 0.26 | 0.13 | 0.05 | 1.18 | 0.01 | 1.18 | 0.01 | 0.97 | 2.00 | 0.04 |
| 36 / 1 . | 37.05 | 2.32 | 16.29 | 19.37 | 0.26 | 10.28 | 0.05 | 10.19 | 95.82 | 18.13 | 1.39 | 3.96 | 2.81 | 1.19 | 0.26 | 0.13 | 0.08 | 1.15 | 0.02 | 1.16 | 0.01 | 0.98 | 2.00 | 0.06 |
| 35 / 1 . | 37.17 | 2.33 | 15.80 | 19.43 | 0.21 | 10.65 | 0.08 | 9.97 | 95.64 | 18.64 | 0.88 | 3.95 | 2.82 | 1.18 | 0.24 | 0.13 | 0.05 | 1.18 | 0.01 | 1.21 | 0.01 | 0.97 | 2.00 | 0.04 |
| 18 / 1 . | 36.92 | 3.06 | 15.59 | 19.19 | 0.22 | 10.35 | 0.08 | 10.05 | 95.46 | 18.82 | 0.41 | 3.93 | 2.81 | 1.19 | 0.21 | 0.18 | 0.02 | 1.20 | 0.01 | 1.18 | 0.01 | 0.98 | 2.00 | 0.02 |
| 19 / 1 . | 37.00 | 2.87 | 15.81 | 19.25 | 0.20 | 10.49 | 0.05 | 9.99 | 95.65 | 18.92 | 0.36 | 3.95 | 2.81 | 1.19 | 0.23 | 0.16 | 0.02 | 1.20 | 0.01 | 1.19 | 0.01 | 0.97 | 2.00 | 0.02 |
| 17 / 1 . | 37.01 | 3.10 | 15.61 | 19.20 | 0.22 | 10.45 | 0.03 | 9.97 | 95.59 | 19.09 | 0.12 | 3.94 | 2.82 | 1.18 | 0.22 | 0.18 | 0.01 | 1.22 | 0.01 | 1.19 | 0.00 | 0.97 | 2.00 | 0.01 |
| 59 / 1 . | 36.75 | 2.88 | 16.05 | 19.90 | 0.28 | 10.16 | 0.07 | 9.88 | 95.97 | 19.88 | 0.03 | 3.94 | 2.80 | 1.20 | 0.23 | 0.16 | 0.00 | 1.26 | 0.02 | 1.15 | 0.01 | 0.96 | 2.00 | 0.00 |
| 58 / 1 . | 36.57 | 2.82 | 15.93 | 19.91 | 0.20 | 10.22 | 0.04 | 10.00 | 95.69 | 19.90 | 0.01 | 3.93 | 2.79 | 1.21 | 0.23 | 0.16 | 0.00 | 1.27 | 0.01 | 1.16 | 0.01 | 0.97 | 2.00 | 0.00 |
| 57 / 1 . | 36.47 | 2.53 | 15.80 | 19.90 | 0.21 | 9.90 | 0.03 | 9.63 | 94.49 | 19.57 | 0.37 | 3.89 | 2.81 | 1.19 | 0.25 | 0.15 | 0.02 | 1.26 | 0.01 | 1.14 | 0.00 | 0.95 | 2.00 | 0.02 |
| 65 / 1 . | 36.92 | 2.05 | 16.09 | 19.50 | 0.17 | 10.75 | 0.02 | 10.19 | 95.69 | 18.59 | 1.01 | 3.95 | 2.81 | 1.19 | 0.25 | 0.12 | 0.06 | 1.18 | 0.01 | 1.22 | 0.00 | 0.99 | 2.00 | 0.05 |
| 64 / 1 . | 37.24 | 1.92 | 16.29 | 19.36 | 0.27 | 10.74 | 0.03 | 10.09 | 95.95 | 18.17 | 1.33 | 3.97 | 2.81 | 1.19 | 0.26 | 0.11 | 0.08 | 1.15 | 0.02 | 1.21 | 0.01 | 0.97 | 2.00 | 0.06 |
| 63 / 1 . | 37.11 | 1.75 | 16.41 | 19.03 | 0.20 | 10.76 | 0.04 | 9.86 | 95.16 | 17.66 | 1.52 | 3.95 | 2.82 | 1.18 | 0.29 | 0.10 | 0.09 | 1.12 | 0.01 | 1.22 | 0.01 | 0.96 | 2.00 | 0.07 |
| 42 / 1 . | 37.02 | 2.27 | 16.06 | 19.24 | 0.21 | 10.56 | 0.07 | 10.13 | 95.57 | 18.14 | 1.22 | 3.95 | 2.81 | 1.19 | 0.25 | 0.13 | 0.07 | 1.15 | 0.01 | 1.20 | 0.01 | 0.98 | 2.00 | 0.06 |
| 41 / 1 . | 37.00 | 2.09 | 16.24 | 19.42 | 0.22 | 10.22 | 0.02 | 10.23 | 95.45 | 17.85 | 1.74 | 3.95 | 2.81 | 1.19 | 0.27 | 0.12 | 0.10 | 1.13 | 0.01 | 1.16 | 0.00 | 0.99 | 2.00 | 0.08 |
| 40 / 1 . | 36.73 | 1.82 | 16.44 | 19.16 | 0.23 | 10.40 | 0.07 | 10.15 | 95.00 | 17.51 | 1.83 | 3.93 | 2.80 | 1.20 | 0.28 | 0.10 | 0.11 | 1.12 | 0.02 | 1.18 | 0.01 | 0.99 | 2.00 | 0.09 |
| 45 / 1 . | 37.33 | 1.76 | 16.54 | 19.07 | 0.18 | 10.49 | 0.04 | 10.00 | 95.40 | 17.18 | 2.10 | 3.97 | 2.82 | 1.18 | 0.30 | 0.10 | 0.12 | 1.09 | 0.01 | 1.18 | 0.01 | 0.96 | 2.00 | 0.10 |
| 44 / 1 . | 37.03 | 2.19 | 16.49 | 19.41 | 0.23 | 10.44 | 0.06 | 10.16 | 96.02 | 18.23 | 1.31 | 3.97 | 2.80 | 1.20 | 0.27 | 0.12 | 0.07 | 1.15 | 0.01 | 1.18 | 0.01 | 0.98 | 2.00 | 0.06 |
| 43 / 1 . | 36.83 | 2.17 | 16.24 | 19.34 | 0.16 | 10.47 | 0.07 | 9.84 | 95.12 | 18.44 | 1.00 | 3.93 | 2.81 | 1.19 | 0.27 | 0.12 | 0.06 | 1.18 | 0.01 | 1.19 | 0.01 | 0.96 | 2.00 | 0.05 |
| 86 / 1 . | 36.81 | 2.23 | 16.02 | 20.37 | 0.24 | 9.27 | 0.11 | 9.73 | 94.76 | 18.89 | 1.65 | 3.91 | 2.83 | 1.17 | 0.28 | 0.13 | 0.10 | 1.21 | 0.02 | 1.06 | 0.02 | 0.95 | 2.00 | 0.07 |
| 85 / 1 . | 36.60 | 2.29 | 16.25 | 19.89 | 0.24 | 8.87 | 0.06 | 9.82 | 94.02 | 17.85 | 2.27 | 3.89 | 2.82 | 1.18 | 0.30 | 0.13 | 0.13 | 1.15 | 0.02 | 1.02 | 0.01 | 0.97 | 2.00 | 0.10 |
| 93 / 1 . | 36.82 | 1.90 | 15.89 | 20.10 | 0.23 | 9.68 | 0.00 | 9.97 | 94.58 | 18.43 | 1.85 | 3.90 | 2.83 | 1.17 | 0.27 | 0.11 | 0.11 | 1.19 | 0.02 | 1.11 | 0.00 | 0.98 | 2.00 | 0.08 |
| 92 / 1 . | 36.51 | 2.00 | 15.70 | 20.40 | 0.21 | 9.75 | 0.03 | 10.05 | 94.65 | 19.19 | 1.35 | 3.89 | 2.82 | 1.18 | 0.25 | 0.12 | 0.08 | 1.24 | 0.01 | 1.12 | 0.00 | 0.99 | 2.00 | 0.06 |
| 95 / 1 . | 36.80 | 2.06 | 15.70 | 20.78 | 0.24 | 9.82 | 0.04 | 9.96 | 95.41 | 19.88 | 0.99 | 3.91 | 2.82 | 1.18 | 0.24 | 0.12 | 0.06 | 1.28 | 0.02 | 1.12 | 0.01 | 0.97 | 2.00 | 0.04 |
| 94 / 1 . | 36.88 | 1.76 | 15.69 | 20.63 | 0.24 | 9.60 | 0.02 | 10.05 | 94.87 | 18.93 | 1.89 | 3.90 | 2.84 | 1.16 | 0.26 | 0.10 | 0.11 | 1.22 | 0.02 | 1.10 | 0.00 | 0.99 | 2.00 | 0.08 |
| 104 / 1 | 36.77 | 2.18 | 15.83 | 20.50 | 0.28 | 8.97 | 0.05 | 9.94 | 94.53 | 18.64 | 2.07 | 3.89 | 2.83 | 1.17 | 0.27 | 0.13 | 0.12 | 1.20 | 0.02 | 1.03 | 0.01 | 0.98 | 2.00 | 0.09 |
| 105 / 1 | 36.34 | 1.51 | 16.69 | 20.50 | 0.24 | 9.34 | 0.06 | 9.42 | 94.12 | 19.04 | 1.62 | 3.88 | 2.81 | 1.19 | 0.33 | 0.09 | 0.09 | 1.23 | 0.02 | 1.08 | 0.01 | 0.93 | 2.00 | 0.07 |
| 53 / 1 . | 36.67 | 2.03 | 15.82 | 20.72 | 0.25 | 9.44 | 0.01 | 10.04 | 94.98 | 19.36 | 1.51 | 3.90 | 2.82 | 1.18 | 0.26 | 0.12 | 0.09 | 1.25 | 0.02 | 1.08 | 0.00 | 0.99 | 2.00 | 0.07 |
| 54 / 1 . | 37.02 | 2.17 | 15.98 | 20.50 | 0.25 | 9.28 | 0.01 | 10.36 | 95.58 | 18.53 | 2.19 | 3.93 | 2.82 | 1.18 | 0.26 | 0.12 | 0.13 | 1.18 | 0.02 | 1.05 | 0.00 | 1.01 | 2.00 | 0.10 |
| 58 / 1 . | 37.16 | 1.80 | 16.17 | 20.36 | 0.29 | 9.66 | 0.02 | 10.03 | 95.47 | 18.52 | 2.04 | 3.94 | 2.83 | 1.17 | 0.28 | 0.10 | 0.12 | 1.18 | 0.02 | 1.10 | 0.00 | 0.97 | 2.00 | 0.09 |
| 57 / 1 . | 37.70 | 1.41 | 16.99 | 19.85 | 0.26 | 9.81 | 0.04 | 9.86 | 95.93 | 17.29 | 2.85 | 3.99 | 2.83 | 1.17 | 0.34 | 0.08 | 0.16 | 1.09 | 0.02 | 1.10 | 0.01 | 0.95 | 2.00 | 0.13 |
| 60 / 1 . | 36.75 | 2.35 | 15.92 | 20.03 | 0.25 | 9.52 | 0.08 | 10.01 | 94.90 | 18.59 | 1.60 | 3.91 | 2.82 | 1.18 | 0.26 | 0.14 | 0.09 | 1.19 | 0.02 | 1.09 | 0.01 | 0.98 | 2.00 | 0.07 |
| 61 / 1 . | 36.11 | 1.95 | 15.80 | 21.00 | 0.24 | 9.91 | 0.04 | 9.98 | 95.04 | 20.62 | 0.42 | 3.88 | 2.79 | 1.21 | 0.23 | 0.11 | 0.02 | 1.33 | 0.02 | 1.14 | 0.01 | 0.98 | 2.00 | 0.02 |
| 72 / 1 . | 36.70 | 2.19 | 15.75 | 20.46 | 0.23 | 9.56 | 0.06 | 9.78 | 94.72 | 19.39 | 1.18 | 3.89 | 2.83 | 1.17 | 0.26 | 0.13 | 0.07 | 1.25 | 0.02 | 1.10 | 0.01 | 0.96 | 2.00 | 0.05 |
| 73 / 1 . | 36.29 | 2.17 | 15.80 | 20.67 | 0.23 | 9.60 | 0.07 | 9.78 | 94.60 | 20.00 | 0.75 | 3.88 | 2.81 | 1.19 | 0.25 | 0.13 | 0.04 | 1.29 | 0.01 | 1.11 | 0.01 | 0.97 | 2.00 | 0.03 |
| 77 / 1 . | 36.57 | 2.39 | 15.51 | 20.78 | 0.31 | 9.46 | 0.07 | 10.07 | 95.17 | 19.86 | 1.02 | 3.89 | 2.82 | 1.18 | 0.23 | 0.14 | 0.06 | 1.28 | 0.02 | 1.09 | 0.01 | 0.99 | 2.00 | 0.04 |
| 78 / 1 . | 36.21 | 1.68 | 16.54 | 19.79 | 0.25 | 9.55 | 0.04 | 9.68 | 93.74 | 18.17 | 1.80 | 3.87 | 2.80 | 1.20 | 0.31 | 0.10 | 0.10 | 1.18 | 0.02 | 1.10 | 0.01 | 0.96 | 2.00 | 0.08 |
| 79 / 1 . | 36.98 | 2.12 | 15.94 | 20.61 | 0.28 | 9.41 | 0.09 | 9.77 | 95.19 | 19.24 | 1.53 | 3.92 | 2.83 | 1.17 | 0.27 | 0.12 | 0.09 | 1.23 | 0.02 | 1.07 | 0.01 | 0.95 | 2.00 | 0.07 |
| 80 / 1 . | 36.48 | 1.50 | 16.57 | 20.04 | 0.26 | 9.34 | 0.02 | 9.85 | 94.04 | 17.86 | 2.42 | 3.89 | 2.81 | 1.19 | 0.32 | 0.09 | 0.14 | 1.15 | 0.02 | 1.07 | 0.00 | 0.97 | 2.00 | 0.11 |
|  | 36.97 | 1.82 | 18.06 | 19.97 | 0.14 | 8.45 | 0.05 | 9.23 | 94.67 | 17.37 | 2.88 | 3.95 | 2.80 | 1.20 | 0.42 | 0.10 | 0.16 | 1.10 | 0.01 | 0.96 | 0.01 | 0.89 | 2.00 | 0.13 |

Appendix II.2.3: Quartz microdiorite

| **a.n.** | **SiO2** | **TiO2** | **Al2O3** | **FeO** | **MnO** | **MgO** | **Na2O** | **K2O** | **Total** | **FeO** | **Fe2O3** | **H2O** | **Si** | **AlIV** | **AlVI** | **Ti** | **Fe3+** | **Fe2+** | **Mn** | **Mg** | **Na** | **K** | **OH** | **Fe3+/ΣFe** |
| --- | --- | --- | --- | --- | --- | --- | --- | --- | --- | --- | --- | --- | --- | --- | --- | --- | --- | --- | --- | --- | --- | --- | --- | --- |
| 124 / 1 | 38.03 | 1.66 | 15.12 | 17.03 | 0.21 | 13.15 | 0.10 | 10.06 | 95.36 | 16.12 | 1.01 | 3.99 | 2.86 | 1.14 | 0.20 | 0.09 | 0.06 | 1.01 | 0.01 | 1.48 | 0.01 | 0.97 | 2.00 | 0.05 |
| 125 / 1 | 38.11 | 1.62 | 15.27 | 16.79 | 0.26 | 13.05 | 0.02 | 9.95 | 95.06 | 15.76 | 1.14 | 3.98 | 2.87 | 1.13 | 0.22 | 0.09 | 0.06 | 0.99 | 0.02 | 1.46 | 0.00 | 0.96 | 2.00 | 0.06 |
| 129 / 1 | 37.98 | 1.65 | 15.78 | 15.78 | 0.17 | 13.59 | 0.03 | 10.03 | 95.02 | 14.75 | 1.14 | 4.00 | 2.85 | 1.15 | 0.24 | 0.09 | 0.06 | 0.92 | 0.01 | 1.52 | 0.00 | 0.96 | 2.00 | 0.07 |
| 128 / 1 | 38.29 | 1.83 | 16.02 | 15.36 | 0.21 | 13.45 | 0.01 | 10.65 | 95.82 | 13.47 | 2.11 | 4.04 | 2.84 | 1.16 | 0.24 | 0.10 | 0.12 | 0.84 | 0.01 | 1.49 | 0.00 | 1.01 | 2.00 | 0.12 |
| 142 / 1 | 38.07 | 2.41 | 15.13 | 16.02 | 0.27 | 13.48 | 0.06 | 10.11 | 95.54 | 15.74 | 0.32 | 4.00 | 2.85 | 1.15 | 0.19 | 0.14 | 0.02 | 0.99 | 0.02 | 1.51 | 0.01 | 0.97 | 2.00 | 0.02 |
| 143 / 1 | 38.17 | 2.22 | 15.71 | 15.59 | 0.23 | 13.18 | 0.06 | 10.05 | 95.21 | 14.50 | 1.21 | 4.01 | 2.85 | 1.15 | 0.23 | 0.12 | 0.07 | 0.91 | 0.01 | 1.47 | 0.01 | 0.96 | 2.00 | 0.07 |
| 145 / 1 | 38.07 | 1.67 | 15.58 | 15.84 | 0.21 | 14.06 | 0.06 | 10.22 | 95.72 | 15.17 | 0.75 | 4.02 | 2.84 | 1.16 | 0.21 | 0.09 | 0.04 | 0.95 | 0.01 | 1.56 | 0.01 | 0.97 | 2.00 | 0.04 |
| 144 / 1 | 38.33 | 1.68 | 15.73 | 15.70 | 0.20 | 13.61 | 0.09 | 10.38 | 95.73 | 14.11 | 1.77 | 4.03 | 2.85 | 1.15 | 0.23 | 0.09 | 0.10 | 0.88 | 0.01 | 1.51 | 0.01 | 0.98 | 2.00 | 0.10 |
| 156 / 1 | 38.23 | 2.00 | 15.46 | 15.73 | 0.24 | 13.82 | 0.06 | 10.08 | 95.63 | 15.12 | 0.68 | 4.02 | 2.85 | 1.15 | 0.21 | 0.11 | 0.04 | 0.94 | 0.02 | 1.54 | 0.01 | 0.96 | 2.00 | 0.04 |
| 155 / 1 | 38.52 | 2.07 | 15.88 | 15.60 | 0.22 | 13.12 | 0.07 | 10.45 | 95.94 | 13.70 | 2.10 | 4.05 | 2.85 | 1.15 | 0.24 | 0.12 | 0.12 | 0.85 | 0.01 | 1.45 | 0.01 | 0.99 | 2.00 | 0.12 |
| 165 / 1 | 38.23 | 1.64 | 15.76 | 15.66 | 0.23 | 13.89 | 0.04 | 10.29 | 95.75 | 14.53 | 1.25 | 4.03 | 2.84 | 1.16 | 0.23 | 0.09 | 0.07 | 0.90 | 0.01 | 1.54 | 0.01 | 0.98 | 2.00 | 0.07 |
| 166 / 1 | 38.45 | 1.68 | 15.55 | 15.83 | 0.23 | 13.63 | 0.05 | 10.28 | 95.70 | 14.40 | 1.60 | 4.03 | 2.86 | 1.14 | 0.22 | 0.09 | 0.09 | 0.90 | 0.01 | 1.51 | 0.01 | 0.98 | 2.00 | 0.09 |
| 167 / 1 | 38.08 | 1.63 | 15.64 | 15.83 | 0.26 | 13.61 | 0.05 | 10.47 | 95.57 | 14.41 | 1.58 | 4.02 | 2.84 | 1.16 | 0.22 | 0.09 | 0.09 | 0.90 | 0.02 | 1.51 | 0.01 | 1.00 | 2.00 | 0.09 |
| 168 / 1 | 38.22 | 1.63 | 15.49 | 15.88 | 0.23 | 13.74 | 0.02 | 10.26 | 95.47 | 14.74 | 1.27 | 4.02 | 2.85 | 1.15 | 0.22 | 0.09 | 0.07 | 0.92 | 0.01 | 1.53 | 0.00 | 0.98 | 2.00 | 0.07 |
| 109 / 1 | 37.91 | 1.67 | 15.39 | 16.52 | 0.23 | 12.38 | 0.02 | 10.22 | 94.35 | 14.47 | 2.28 | 3.96 | 2.87 | 1.13 | 0.24 | 0.10 | 0.13 | 0.92 | 0.01 | 1.40 | 0.00 | 0.99 | 2.00 | 0.12 |
| 110 / 1 | 37.24 | 1.72 | 15.03 | 16.62 | 0.24 | 12.95 | 0.06 | 10.36 | 94.22 | 15.54 | 1.20 | 3.93 | 2.84 | 1.16 | 0.19 | 0.10 | 0.07 | 0.99 | 0.02 | 1.47 | 0.01 | 1.01 | 2.00 | 0.06 |
| 122 / 1 | 38.02 | 1.61 | 15.66 | 15.54 | 0.21 | 13.51 | 0.05 | 10.02 | 94.63 | 14.19 | 1.51 | 3.99 | 2.85 | 1.15 | 0.24 | 0.09 | 0.09 | 0.89 | 0.01 | 1.51 | 0.01 | 0.96 | 2.00 | 0.09 |
| 121 / 1 | 38.49 | 1.61 | 15.98 | 15.38 | 0.20 | 13.33 | 0.04 | 10.28 | 95.32 | 13.23 | 2.39 | 4.04 | 2.86 | 1.14 | 0.26 | 0.09 | 0.13 | 0.82 | 0.01 | 1.48 | 0.01 | 0.97 | 2.00 | 0.14 |
| 140 / 1 | 37.79 | 2.71 | 15.80 | 16.78 | 0.17 | 11.40 | 0.05 | 10.24 | 94.93 | 15.00 | 1.98 | 3.98 | 2.85 | 1.15 | 0.25 | 0.15 | 0.11 | 0.94 | 0.01 | 1.28 | 0.01 | 0.98 | 2.00 | 0.11 |

Appendix II.2.4: Biotite monzogranites

| **a.n.** | **SiO2** | **TiO2** | **Al2O3** | **FeO** | **MnO** | **MgO** | **Na2O** | **K2O** | **Total** | **FeO** | **Fe2O3** | **H2O** | **Si** | **AlIV** | **AlVI** | **Ti** | **Fe3+** | **Fe2+** | **Mn** | **Mg** | **Na** | **K** | **OH** | **Fe3+/ΣFe** |
| --- | --- | --- | --- | --- | --- | --- | --- | --- | --- | --- | --- | --- | --- | --- | --- | --- | --- | --- | --- | --- | --- | --- | --- | --- |
| 7 / 1 . | 37.58 | 3.32 | 18.03 | 17.43 | 0.22 | 8.62 | 0.09 | 9.79 | 95.08 | 14.30 | 3.48 | 4.02 | 2.81 | 1.19 | 0.39 | 0.19 | 0.20 | 0.89 | 0.01 | 0.96 | 0.01 | 0.93 | 2.00 | 0.18 |
| 6 / 1 . | 37.18 | 3.30 | 17.85 | 17.96 | 0.21 | 8.06 | 0.07 | 9.81 | 94.43 | 14.71 | 3.61 | 3.97 | 2.81 | 1.19 | 0.39 | 0.19 | 0.20 | 0.93 | 0.01 | 0.91 | 0.01 | 0.94 | 2.00 | 0.18 |
| 5 / 1 . | 37.12 | 2.54 | 17.06 | 17.08 | 0.24 | 9.05 | 0.10 | 9.85 | 93.04 | 13.41 | 4.07 | 3.93 | 2.83 | 1.17 | 0.37 | 0.15 | 0.23 | 0.86 | 0.02 | 1.03 | 0.01 | 0.96 | 2.00 | 0.21 |
| 155 / 1 | 36.42 | 3.74 | 17.59 | 18.01 | 0.21 | 8.32 | 0.06 | 9.75 | 94.09 | 16.10 | 2.12 | 3.93 | 2.78 | 1.22 | 0.36 | 0.21 | 0.12 | 1.03 | 0.01 | 0.95 | 0.01 | 0.95 | 2.00 | 0.11 |
| 156 / 1 | 36.50 | 3.49 | 18.10 | 17.33 | 0.22 | 8.28 | 0.04 | 9.76 | 93.72 | 14.67 | 2.96 | 3.94 | 2.78 | 1.22 | 0.40 | 0.20 | 0.17 | 0.93 | 0.01 | 0.94 | 0.01 | 0.95 | 2.00 | 0.15 |
| 157 / 1 | 36.70 | 3.65 | 17.97 | 17.53 | 0.21 | 8.58 | 0.07 | 9.97 | 94.68 | 15.19 | 2.60 | 3.97 | 2.77 | 1.23 | 0.37 | 0.21 | 0.15 | 0.96 | 0.01 | 0.97 | 0.01 | 0.96 | 2.00 | 0.13 |
| 158 / 1 | 36.86 | 2.73 | 18.38 | 17.94 | 0.22 | 8.53 | 0.09 | 9.45 | 94.18 | 15.10 | 3.15 | 3.97 | 2.79 | 1.21 | 0.42 | 0.15 | 0.18 | 0.95 | 0.01 | 0.96 | 0.01 | 0.91 | 2.00 | 0.16 |
| 160 / 1 | 36.74 | 3.52 | 18.12 | 17.51 | 0.24 | 8.46 | 0.01 | 10.07 | 94.65 | 14.85 | 2.95 | 3.98 | 2.77 | 1.23 | 0.38 | 0.20 | 0.17 | 0.94 | 0.02 | 0.95 | 0.00 | 0.97 | 2.00 | 0.15 |
| 161 1 | 37.48 | 2.47 | 18.52 | 16.53 | 0.22 | 8.75 | 0.10 | 10.28 | 94.36 | 11.65 | 5.42 | 4.01 | 2.80 | 1.20 | 0.43 | 0.14 | 0.30 | 0.73 | 0.01 | 0.98 | 0.01 | 0.98 | 2.00 | 0.29 |
| 162 / 1 | 36.66 | 2.87 | 18.32 | 17.81 | 0.20 | 8.39 | 0.04 | 10.09 | 94.39 | 14.50 | 3.68 | 3.97 | 2.77 | 1.23 | 0.41 | 0.16 | 0.21 | 0.92 | 0.01 | 0.95 | 0.01 | 0.97 | 2.00 | 0.19 |
| 163 / 1 | 36.88 | 2.55 | 17.82 | 17.79 | 0.26 | 8.65 | 0.06 | 10.04 | 94.05 | 14.26 | 3.92 | 3.95 | 2.80 | 1.20 | 0.39 | 0.15 | 0.22 | 0.90 | 0.02 | 0.98 | 0.01 | 0.97 | 2.00 | 0.20 |
| 8 / 1 . | 36.87 | 3.50 | 18.18 | 17.38 | 0.21 | 7.86 | 0.08 | 9.58 | 93.67 | 14.17 | 3.56 | 3.96 | 2.79 | 1.21 | 0.42 | 0.20 | 0.20 | 0.90 | 0.01 | 0.89 | 0.01 | 0.93 | 2.00 | 0.18 |
| 9 / 1 . | 37.44 | 2.91 | 17.77 | 15.88 | 0.17 | 9.35 | 0.19 | 9.18 | 92.90 | 12.55 | 3.71 | 3.97 | 2.83 | 1.17 | 0.41 | 0.17 | 0.21 | 0.79 | 0.01 | 1.05 | 0.03 | 0.89 | 2.00 | 0.21 |
| 11 / 1 . | 37.41 | 3.14 | 18.28 | 17.37 | 0.18 | 8.62 | 0.05 | 9.65 | 94.69 | 14.26 | 3.45 | 4.00 | 2.80 | 1.20 | 0.41 | 0.18 | 0.19 | 0.89 | 0.01 | 0.96 | 0.01 | 0.92 | 2.00 | 0.18 |
| 10 / 1 . | 37.68 | 3.18 | 18.59 | 17.33 | 0.25 | 8.44 | 0.06 | 10.13 | 95.66 | 13.53 | 4.22 | 4.05 | 2.79 | 1.21 | 0.42 | 0.18 | 0.24 | 0.84 | 0.02 | 0.93 | 0.01 | 0.96 | 2.00 | 0.22 |
| 16 / 1 . | 37.02 | 3.45 | 17.61 | 17.32 | 0.20 | 8.59 | 0.09 | 9.89 | 94.17 | 14.43 | 3.22 | 3.96 | 2.80 | 1.20 | 0.37 | 0.20 | 0.18 | 0.91 | 0.01 | 0.97 | 0.01 | 0.95 | 2.00 | 0.17 |
| 17 / 1 . | 37.27 | 3.11 | 18.44 | 17.08 | 0.22 | 8.31 | 0.03 | 10.30 | 94.76 | 12.97 | 4.56 | 4.01 | 2.79 | 1.21 | 0.42 | 0.17 | 0.26 | 0.81 | 0.01 | 0.93 | 0.00 | 0.98 | 2.00 | 0.24 |
| 29 / 1 . | 37.36 | 3.72 | 17.59 | 17.83 | 0.20 | 8.46 | 0.10 | 10.02 | 95.28 | 15.10 | 3.04 | 4.00 | 2.80 | 1.20 | 0.35 | 0.21 | 0.17 | 0.95 | 0.01 | 0.95 | 0.01 | 0.96 | 2.00 | 0.15 |
| 30 / 1 . | 37.03 | 3.48 | 18.47 | 16.98 | 0.18 | 8.14 | 0.02 | 9.75 | 94.05 | 13.66 | 3.69 | 3.98 | 2.79 | 1.21 | 0.43 | 0.20 | 0.21 | 0.86 | 0.01 | 0.91 | 0.00 | 0.94 | 2.00 | 0.20 |
| 31 / 1 . | 36.30 | 3.46 | 17.50 | 18.01 | 0.28 | 8.26 | 0.15 | 9.80 | 93.76 | 15.65 | 2.62 | 3.92 | 2.78 | 1.22 | 0.36 | 0.20 | 0.15 | 1.00 | 0.02 | 0.94 | 0.02 | 0.96 | 2.00 | 0.13 |
| 32 / 1 . | 36.75 | 2.95 | 17.85 | 18.01 | 0.25 | 8.69 | 0.07 | 9.82 | 94.39 | 15.39 | 2.91 | 3.96 | 2.79 | 1.21 | 0.38 | 0.17 | 0.17 | 0.98 | 0.02 | 0.98 | 0.01 | 0.95 | 2.00 | 0.15 |
| 37 / 1 . | 37.23 | 3.18 | 17.66 | 17.52 | 0.26 | 8.92 | 0.05 | 9.91 | 94.74 | 14.79 | 3.04 | 3.98 | 2.80 | 1.20 | 0.37 | 0.18 | 0.17 | 0.93 | 0.02 | 1.00 | 0.01 | 0.95 | 2.00 | 0.16 |
| 36 / 1 . | 36.99 | 3.00 | 17.81 | 18.02 | 0.22 | 8.63 | 0.06 | 9.81 | 94.53 | 15.25 | 3.08 | 3.97 | 2.80 | 1.20 | 0.38 | 0.17 | 0.17 | 0.96 | 0.01 | 0.97 | 0.01 | 0.95 | 2.00 | 0.15 |
| 44 / 1 . | 37.44 | 3.24 | 18.57 | 17.40 | 0.26 | 7.95 | 0.10 | 9.86 | 94.83 | 13.48 | 4.35 | 4.01 | 2.80 | 1.20 | 0.43 | 0.18 | 0.24 | 0.84 | 0.02 | 0.89 | 0.01 | 0.94 | 2.00 | 0.23 |
| 41 / 1 . | 38.07 | 2.87 | 18.27 | 17.14 | 0.22 | 8.04 | 0.09 | 9.94 | 94.63 | 12.24 | 5.45 | 4.03 | 2.83 | 1.17 | 0.44 | 0.16 | 0.31 | 0.76 | 0.01 | 0.89 | 0.01 | 0.94 | 2.00 | 0.29 |
| 42 / 1 . | 37.51 | 3.27 | 18.36 | 17.34 | 0.25 | 8.21 | 0.08 | 9.91 | 94.93 | 13.62 | 4.13 | 4.02 | 2.80 | 1.20 | 0.42 | 0.18 | 0.23 | 0.85 | 0.02 | 0.91 | 0.01 | 0.94 | 2.00 | 0.21 |
| 43 / 1 . | 38.47 | 1.69 | 19.64 | 16.38 | 0.25 | 8.84 | 0.07 | 10.10 | 95.43 | 10.35 | 6.70 | 4.10 | 2.82 | 1.18 | 0.51 | 0.09 | 0.37 | 0.63 | 0.02 | 0.96 | 0.01 | 0.94 | 2.00 | 0.37 |
| 4 / 1 . | 37.73 | 2.98 | 18.91 | 18.04 | 0.24 | 8.15 | 0.06 | 9.48 | 95.58 | 14.71 | 3.71 | 4.04 | 2.80 | 1.20 | 0.45 | 0.17 | 0.21 | 0.91 | 0.01 | 0.90 | 0.01 | 0.90 | 2.00 | 0.18 |
| 167 / 1 | 37.01 | 3.48 | 17.94 | 17.00 | 0.24 | 8.48 | 0.04 | 9.99 | 94.18 | 13.85 | 3.50 | 3.97 | 2.79 | 1.21 | 0.39 | 0.20 | 0.20 | 0.87 | 0.02 | 0.95 | 0.01 | 0.96 | 2.00 | 0.19 |

Appendix II.3: White micas (IM2-31-0T4O10W2) : Monzoranites à deux micas (SBKO52)

| **a.n.** | **SiO2** | **TiO2** | **Al2O3** | **FeO** | **MnO** | **MgO** | **Na2O** | **K2O** | **Total** | **Si** | **AlT** | **AlM** | **Fe** | **Mg** | **Na** | **K** | **Mn/Fe** |
| --- | --- | --- | --- | --- | --- | --- | --- | --- | --- | --- | --- | --- | --- | --- | --- | --- | --- |
| 137 / 1 | 46.84 | 0.47 | 32.56 | 2.18 | 0.04 | 1.39 | 0.26 | 12.03 | 95.82 | 3.15 | 0.85 | 1.72 | 0.12 | 0.14 | 0.03 | 1.03 | 0.02 |
| 136 / 1 | 45.66 | 0.54 | 34.73 | 1.80 | 0.05 | 0.89 | 0.23 | 12.22 | 96.18 | 3.05 | 0.95 | 1.79 | 0.10 | 0.09 | 0.03 | 1.04 | 0.03 |
| 140 / 1 | 45.32 | 0.44 | 35.18 | 1.72 | 0.07 | 0.75 | 0.49 | 11.62 | 95.63 | 3.04 | 0.96 | 1.82 | 0.10 | 0.07 | 0.06 | 0.99 | 0.04 |
| 139 / 1 | 47.74 | 0.29 | 30.13 | 2.61 | 0.07 | 1.74 | 0.37 | 11.91 | 94.94 | 3.24 | 0.76 | 1.65 | 0.15 | 0.18 | 0.05 | 1.03 | 0.03 |
| 142 / 1 | 45.90 | 0.87 | 34.46 | 1.85 | 0.03 | 0.88 | 0.34 | 11.76 | 96.20 | 3.06 | 0.94 | 1.78 | 0.10 | 0.09 | 0.04 | 1.00 | 0.02 |
| 141 / 1 | 46.34 | 0.78 | 33.86 | 2.16 | 0.04 | 1.13 | 0.33 | 11.63 | 96.42 | 3.09 | 0.91 | 1.75 | 0.12 | 0.11 | 0.04 | 0.99 | 0.02 |
| 144 / 1 | 45.94 | 0.77 | 34.28 | 2.01 | 0.01 | 1.01 | 0.32 | 11.68 | 96.08 | 3.07 | 0.93 | 1.77 | 0.11 | 0.10 | 0.04 | 1.00 | 0.00 |
| 143 / 1 | 46.87 | 0.60 | 33.11 | 2.32 | 0.05 | 1.36 | 0.22 | 11.95 | 96.54 | 3.12 | 0.88 | 1.73 | 0.13 | 0.13 | 0.03 | 1.02 | 0.02 |
| 146 / 1 | 46.09 | 0.71 | 33.48 | 2.17 | 0.02 | 1.10 | 0.25 | 11.82 | 95.72 | 3.10 | 0.90 | 1.75 | 0.12 | 0.11 | 0.03 | 1.01 | 0.01 |
| 145 / 1 | 46.09 | 0.42 | 36.42 | 1.47 | 0.01 | 0.61 | 0.56 | 11.59 | 97.33 | 3.03 | 0.97 | 1.85 | 0.08 | 0.06 | 0.07 | 0.97 | 0.01 |
| 124 / 1 | 46.47 | 1.10 | 32.18 | 2.48 | 0.05 | 1.45 | 0.24 | 11.75 | 95.77 | 3.13 | 0.87 | 1.68 | 0.14 | 0.15 | 0.03 | 1.01 | 0.02 |
| 123 / 1 | 46.60 | 1.16 | 28.45 | 3.93 | 0.13 | 2.69 | 0.09 | 11.75 | 94.86 | 3.20 | 0.80 | 1.50 | 0.23 | 0.28 | 0.01 | 1.03 | 0.03 |
| 111 / 1 | 46.94 | 1.13 | 32.61 | 2.36 | 0.05 | 1.38 | 0.23 | 11.80 | 96.50 | 3.13 | 0.87 | 1.69 | 0.13 | 0.14 | 0.03 | 1.00 | 0.02 |
| 112 / 1 | 46.45 | 0.94 | 31.96 | 2.53 | 0.07 | 1.37 | 0.31 | 11.75 | 95.41 | 3.14 | 0.86 | 1.68 | 0.14 | 0.14 | 0.04 | 1.01 | 0.03 |

Appendix II.4: Plagioclases

Appendix II.4.1: Quartz-gabbroic diorite (SSSK28, SBNK72)

| **a.n.** | **SiO2** | **Al2O3** | **CaO** | **Na2O** | **K2O** | **Total** | **Si** | **Al** | **Ca** | **Na** | **K** | **An** | **Ab** | **Or** |
| --- | --- | --- | --- | --- | --- | --- | --- | --- | --- | --- | --- | --- | --- | --- |
| 216/ 1 . | 57.35 | 27.29 | 9.05 | 5.96 | 0.22 | 99.87 | 2.57 | 1.44 | 0.43 | 0.52 | 0.01 | 45.03 | 53.66 | 1.31 |
| 217/ 1 . | 57.41 | 26.99 | 8.70 | 6.27 | 0.17 | 99.54 | 2.58 | 1.43 | 0.42 | 0.55 | 0.01 | 42.95 | 56.03 | 1.02 |
| 218/ 1 . | 57.59 | 27.52 | 9.00 | 6.40 | 0.19 | 100.70 | 2.56 | 1.44 | 0.43 | 0.55 | 0.01 | 43.25 | 55.64 | 1.11 |
| 219/ 1 . | 57.10 | 27.87 | 9.40 | 5.93 | 0.20 | 100.49 | 2.55 | 1.46 | 0.45 | 0.51 | 0.01 | 46.13 | 52.72 | 1.14 |
| 200/ 1 . | 58.41 | 26.86 | 8.37 | 6.85 | 0.10 | 100.59 | 2.60 | 1.41 | 0.40 | 0.59 | 0.01 | 40.08 | 59.35 | 0.57 |
| 199/ 1 . | 58.50 | 26.88 | 8.38 | 6.76 | 0.13 | 100.64 | 2.60 | 1.41 | 0.40 | 0.58 | 0.01 | 40.37 | 58.90 | 0.73 |
| 198/ 1 . | 58.10 | 27.01 | 8.69 | 6.39 | 0.15 | 100.34 | 2.59 | 1.42 | 0.41 | 0.55 | 0.01 | 42.55 | 56.59 | 0.86 |
| 197 / 1 | 56.38 | 28.27 | 9.99 | 5.65 | 0.13 | 100.43 | 2.52 | 1.49 | 0.48 | 0.49 | 0.01 | 49.03 | 50.20 | 0.77 |
| 133 / 1 | 58.11 | 26.63 | 8.44 | 6.30 | 0.15 | 99.64 | 2.60 | 1.41 | 0.41 | 0.55 | 0.01 | 42.16 | 56.94 | 0.91 |
| 134 / 1 | 58.18 | 26.69 | 8.41 | 6.70 | 0.21 | 100.18 | 2.60 | 1.40 | 0.40 | 0.58 | 0.01 | 40.47 | 58.32 | 1.20 |
| 135 / 1 | 57.99 | 26.42 | 8.23 | 6.57 | 0.17 | 99.38 | 2.61 | 1.40 | 0.40 | 0.57 | 0.01 | 40.48 | 58.51 | 1.01 |
| 140 / 1 | 57.87 | 26.79 | 8.43 | 6.60 | 0.19 | 99.89 | 2.59 | 1.41 | 0.40 | 0.57 | 0.01 | 40.91 | 57.97 | 1.12 |
| 141 / 1 | 58.80 | 26.74 | 8.11 | 7.03 | 0.14 | 100.81 | 2.61 | 1.40 | 0.39 | 0.60 | 0.01 | 38.62 | 60.58 | 0.81 |
| 142 / 1 | 58.65 | 26.30 | 7.93 | 6.88 | 0.17 | 99.93 | 2.62 | 1.38 | 0.38 | 0.60 | 0.01 | 38.52 | 60.53 | 0.96 |
| 149 / 1 | 57.24 | 27.21 | 9.01 | 6.28 | 0.16 | 99.90 | 2.57 | 1.44 | 0.43 | 0.55 | 0.01 | 43.82 | 55.25 | 0.93 |
| 147 / 1 | 58.51 | 26.80 | 8.31 | 6.83 | 0.10 | 100.55 | 2.60 | 1.40 | 0.40 | 0.59 | 0.01 | 39.95 | 59.49 | 0.56 |
| 163 / 1 | 57.86 | 26.92 | 8.51 | 6.32 | 0.17 | 99.78 | 2.59 | 1.42 | 0.41 | 0.55 | 0.01 | 42.23 | 56.75 | 1.02 |
| 164 / 1 | 57.56 | 26.64 | 8.44 | 6.27 | 0.22 | 99.12 | 2.59 | 1.41 | 0.41 | 0.55 | 0.01 | 42.11 | 56.59 | 1.30 |
| 170 / 1 | 57.51 | 27.04 | 8.77 | 6.25 | 0.17 | 99.75 | 2.58 | 1.43 | 0.42 | 0.54 | 0.01 | 43.21 | 55.78 | 1.02 |
| 169 / 1 | 57.87 | 26.74 | 8.47 | 6.45 | 0.23 | 99.76 | 2.59 | 1.41 | 0.41 | 0.56 | 0.01 | 41.49 | 57.18 | 1.32 |
|  | 54.48 | 28.85 | 11.04 | 4.89 | 0.04 | 99.30 | 2.47 | 1.54 | 0.54 | 0.43 | 0.00 | 55.36 | 44.40 | 0.24 |
|  | 56.39 | 28.13 | 9.82 | 5.73 | 0.06 | 100.13 | 2.52 | 1.48 | 0.47 | 0.50 | 0.00 | 48.47 | 51.18 | 0.36 |
|  | 56.55 | 28.31 | 9.94 | 5.78 | 0.04 | 100.62 | 2.52 | 1.49 | 0.47 | 0.50 | 0.00 | 48.62 | 51.14 | 0.24 |
|  | 57.00 | 27.78 | 9.29 | 6.04 | 0.04 | 100.16 | 2.55 | 1.46 | 0.44 | 0.52 | 0.00 | 45.81 | 53.93 | 0.25 |
|  | 54.45 | 29.03 | 11.04 | 5.05 | 0.04 | 99.60 | 2.46 | 1.55 | 0.53 | 0.44 | 0.00 | 54.58 | 45.16 | 0.26 |
|  | 56.44 | 28.27 | 9.99 | 6.17 | 0.06 | 100.94 | 2.51 | 1.48 | 0.48 | 0.53 | 0.00 | 47.07 | 52.57 | 0.36 |

Appendix II.4.2: Monzogabbro (SBNK49)

| **a.n.** | **SiO2** | **Al2O3** | **CaO** | **Na2O** | **K2O** | **Total** | **Si** | **Al** | **Ca** | **Na** | **K** | **An** | **Ab** | **Or** |
| --- | --- | --- | --- | --- | --- | --- | --- | --- | --- | --- | --- | --- | --- | --- |
| 101 / 1 . | 56.63 | 28.09 | 9.80 | 5.76 | 0.05 | 100.32 | 2.53 | 1.48 | 0.47 | 0.50 | 0.00 | 48.33 | 51.40 | 0.27 |
| 100 / 1 . | 56.52 | 28.07 | 9.74 | 5.82 | 0.05 | 100.19 | 2.53 | 1.48 | 0.47 | 0.50 | 0.00 | 47.90 | 51.80 | 0.30 |
| 99 / 1 . | 56.56 | 28.01 | 9.71 | 6.04 | 0.10 | 100.41 | 2.53 | 1.47 | 0.46 | 0.52 | 0.01 | 46.81 | 52.65 | 0.55 |
| 98 / 1 . | 55.58 | 28.60 | 10.52 | 5.37 | 0.07 | 100.13 | 2.49 | 1.51 | 0.51 | 0.47 | 0.00 | 51.75 | 47.83 | 0.42 |
| 12 / 1 . | 55.41 | 28.88 | 10.66 | 5.36 | 0.05 | 100.36 | 2.48 | 1.52 | 0.51 | 0.47 | 0.00 | 52.20 | 47.48 | 0.32 |
| 11 / 1 . | 55.45 | 29.20 | 10.95 | 5.26 | 0.04 | 100.90 | 2.47 | 1.53 | 0.52 | 0.45 | 0.00 | 53.37 | 46.41 | 0.22 |
| 20 / 1 . | 54.92 | 29.25 | 10.94 | 5.13 | 0.05 | 100.29 | 2.46 | 1.55 | 0.53 | 0.45 | 0.00 | 53.97 | 45.74 | 0.29 |
| 31 / 1 . | 56.91 | 28.04 | 9.58 | 5.84 | 0.07 | 100.45 | 2.54 | 1.47 | 0.46 | 0.51 | 0.00 | 47.35 | 52.23 | 0.43 |
| 91 / 1 . | 56.55 | 28.31 | 9.94 | 5.78 | 0.04 | 100.62 | 2.52 | 1.49 | 0.47 | 0.50 | 0.00 | 48.62 | 51.14 | 0.24 |
| 90 / 1 . | 56.39 | 28.13 | 9.82 | 5.73 | 0.06 | 100.13 | 2.52 | 1.48 | 0.47 | 0.50 | 0.00 | 48.47 | 51.18 | 0.36 |
| 89 / 1 . | 57.00 | 27.78 | 9.29 | 6.04 | 0.04 | 100.16 | 2.55 | 1.46 | 0.44 | 0.52 | 0.00 | 45.81 | 53.93 | 0.25 |
| 81 / 1 . | 56.44 | 28.27 | 9.99 | 6.17 | 0.06 | 100.94 | 2.51 | 1.48 | 0.48 | 0.53 | 0.00 | 47.07 | 52.57 | 0.36 |
| 83 / 1 . | 54.45 | 29.03 | 11.04 | 5.05 | 0.04 | 99.60 | 2.46 | 1.55 | 0.53 | 0.44 | 0.00 | 54.58 | 45.16 | 0.26 |
| 24 / 1 . | 54.63 | 29.31 | 11.34 | 4.82 | 0.10 | 100.20 | 2.45 | 1.55 | 0.55 | 0.42 | 0.01 | 56.21 | 43.22 | 0.57 |
| 23 / 1 . | 56.86 | 28.01 | 9.63 | 5.96 | 0.04 | 100.50 | 2.53 | 1.47 | 0.46 | 0.51 | 0.00 | 47.07 | 52.71 | 0.23 |
| 43 / 1 . | 54.48 | 28.85 | 11.04 | 4.89 | 0.04 | 99.30 | 2.47 | 1.54 | 0.54 | 0.43 | 0.00 | 55.36 | 44.40 | 0.24 |

Appendix II.4.3: Granodiorite (SSGL32, SDIA4, SBGS54)

| **a.n.** | **SiO2** | **Al2O3** | **CaO** | **Na2O** | **K2O** | **Total** | **Si** | **Al** | **Ca** | **Na** | **K** | **An** | **Ab** | **Or** |
| --- | --- | --- | --- | --- | --- | --- | --- | --- | --- | --- | --- | --- | --- | --- |
| 181 / 1 . | 56.02 | 28.73 | 10.33 | 5.65 | 0.08 | 100.81 | 2.50 | 1.51 | 0.49 | 0.49 | 0.00 | 50.01 | 49.56 | 0.44 |
| 182 / 1 . | 58.03 | 27.38 | 8.60 | 6.25 | 0.12 | 100.37 | 2.58 | 1.44 | 0.41 | 0.54 | 0.01 | 42.91 | 56.39 | 0.70 |
| 183 / 1 . | 57.10 | 27.95 | 9.48 | 5.84 | 0.05 | 100.41 | 2.54 | 1.47 | 0.45 | 0.50 | 0.00 | 47.15 | 52.56 | 0.30 |
| 186 / 1 . | 56.49 | 28.43 | 10.07 | 5.43 | 0.09 | 100.52 | 2.52 | 1.49 | 0.48 | 0.47 | 0.00 | 50.34 | 49.15 | 0.52 |
| 185 / 1 . | 54.28 | 29.56 | 11.74 | 4.66 | 0.06 | 100.30 | 2.44 | 1.57 | 0.57 | 0.41 | 0.00 | 58.02 | 41.62 | 0.36 |
| 189 / 1 . | 58.30 | 26.89 | 8.50 | 6.47 | 0.08 | 100.23 | 2.60 | 1.41 | 0.41 | 0.56 | 0.00 | 41.86 | 57.69 | 0.45 |
| 188 / 1 . | 55.65 | 28.59 | 10.61 | 5.30 | 0.05 | 100.20 | 2.50 | 1.51 | 0.51 | 0.46 | 0.00 | 52.34 | 47.34 | 0.31 |
| 187 / 1 . | 58.31 | 27.28 | 8.70 | 6.25 | 0.08 | 100.61 | 2.58 | 1.43 | 0.41 | 0.54 | 0.00 | 43.27 | 56.27 | 0.46 |
| 190 / 1 . | 55.22 | 29.37 | 11.13 | 4.85 | 0.04 | 100.62 | 2.47 | 1.55 | 0.53 | 0.42 | 0.00 | 55.75 | 44.00 | 0.26 |
| 191 / 1 . | 54.94 | 29.63 | 11.29 | 4.79 | 0.03 | 100.69 | 2.45 | 1.56 | 0.54 | 0.41 | 0.00 | 56.44 | 43.36 | 0.20 |
| 208 / 1 . | 55.55 | 28.92 | 10.42 | 5.61 | 0.16 | 100.66 | 2.48 | 1.52 | 0.50 | 0.49 | 0.01 | 50.20 | 48.89 | 0.91 |
| 209 / 1 . | 58.06 | 27.37 | 8.67 | 6.50 | 0.06 | 100.65 | 2.58 | 1.43 | 0.41 | 0.56 | 0.00 | 42.30 | 57.37 | 0.33 |
| 210 / 1 . | 55.49 | 28.17 | 10.31 | 5.36 | 0.05 | 99.37 | 2.51 | 1.50 | 0.50 | 0.47 | 0.00 | 51.36 | 48.35 | 0.28 |
| 8 / 1 . | 58.60 | 26.65 | 7.89 | 7.05 | 0.10 | 100.30 | 2.61 | 1.40 | 0.38 | 0.61 | 0.01 | 37.97 | 61.44 | 0.59 |
| 7 / 1 . | 57.17 | 27.27 | 9.09 | 6.51 | 0.16 | 100.19 | 2.56 | 1.44 | 0.44 | 0.56 | 0.01 | 43.18 | 55.93 | 0.89 |
| 6 / 1 . | 59.35 | 26.48 | 7.42 | 7.10 | 0.18 | 100.52 | 2.63 | 1.38 | 0.35 | 0.61 | 0.01 | 36.23 | 62.73 | 1.03 |
| 5 / 1 . | 59.91 | 25.80 | 6.93 | 7.67 | 0.24 | 100.55 | 2.66 | 1.35 | 0.33 | 0.66 | 0.01 | 32.84 | 65.79 | 1.37 |
| 20 / 1 . | 58.98 | 26.33 | 7.52 | 7.54 | 0.10 | 100.47 | 2.62 | 1.38 | 0.36 | 0.65 | 0.01 | 35.33 | 64.11 | 0.56 |
| 21 / 1 . | 58.77 | 26.21 | 7.76 | 7.08 | 0.17 | 99.98 | 2.62 | 1.38 | 0.37 | 0.61 | 0.01 | 37.38 | 61.67 | 0.95 |
| 22 / 1 . | 58.96 | 26.44 | 7.85 | 7.49 | 0.15 | 100.88 | 2.61 | 1.38 | 0.37 | 0.64 | 0.01 | 36.38 | 62.81 | 0.81 |
| 23 / 1 . | 60.07 | 25.42 | 6.66 | 8.01 | 0.18 | 100.34 | 2.67 | 1.33 | 0.32 | 0.69 | 0.01 | 31.19 | 67.83 | 0.99 |
| 69 / 1 . | 56.73 | 27.27 | 9.23 | 6.43 | 0.11 | 99.76 | 2.55 | 1.45 | 0.44 | 0.56 | 0.01 | 43.95 | 55.42 | 0.63 |
| 68 / 1 . | 57.75 | 26.83 | 8.44 | 7.14 | 0.11 | 100.26 | 2.58 | 1.41 | 0.40 | 0.62 | 0.01 | 39.28 | 60.11 | 0.61 |
| 67 / 1 . | 61.60 | 24.74 | 5.82 | 8.58 | 0.14 | 100.87 | 2.71 | 1.28 | 0.27 | 0.73 | 0.01 | 27.06 | 72.17 | 0.77 |
| 66 / 1 . | 61.42 | 24.31 | 5.66 | 8.65 | 0.08 | 100.11 | 2.72 | 1.27 | 0.27 | 0.74 | 0.00 | 26.45 | 73.13 | 0.42 |
| 31 / 1 . | 56.41 | 27.76 | 9.71 | 5.99 | 0.11 | 99.99 | 2.53 | 1.47 | 0.47 | 0.52 | 0.01 | 46.94 | 52.42 | 0.64 |
| 32 / 1 . | 61.07 | 24.76 | 6.08 | 8.42 | 0.09 | 100.43 | 2.70 | 1.29 | 0.29 | 0.72 | 0.01 | 28.39 | 71.12 | 0.49 |
| 33 / 1 . | 60.45 | 24.96 | 6.32 | 8.09 | 0.14 | 99.96 | 2.69 | 1.31 | 0.30 | 0.70 | 0.01 | 29.90 | 69.29 | 0.81 |
| 34 / 1 . | 61.37 | 24.47 | 5.69 | 8.58 | 0.14 | 100.25 | 2.72 | 1.28 | 0.27 | 0.74 | 0.01 | 26.62 | 72.58 | 0.79 |
| 56 / 1 . | 61.55 | 24.54 | 5.53 | 8.34 | 0.08 | 100.05 | 2.73 | 1.28 | 0.26 | 0.72 | 0.00 | 26.69 | 72.83 | 0.48 |
| 55 / 1 . | 61.74 | 24.42 | 5.68 | 8.80 | 0.09 | 100.73 | 2.72 | 1.27 | 0.27 | 0.75 | 0.00 | 26.14 | 73.39 | 0.47 |
| 54 / 1 . | 61.99 | 24.60 | 5.76 | 8.27 | 0.15 | 100.76 | 2.73 | 1.28 | 0.27 | 0.71 | 0.01 | 27.55 | 71.62 | 0.83 |
| 62 / 1 . | 59.18 | 26.08 | 7.60 | 7.25 | 0.15 | 100.27 | 2.63 | 1.37 | 0.36 | 0.63 | 0.01 | 36.36 | 62.77 | 0.88 |
| 61 / 1 . | 60.64 | 25.20 | 6.52 | 8.30 | 0.10 | 100.76 | 2.68 | 1.31 | 0.31 | 0.71 | 0.01 | 30.09 | 69.37 | 0.53 |
| 60 / 1 . | 58.81 | 26.32 | 7.74 | 7.34 | 0.16 | 100.37 | 2.62 | 1.38 | 0.37 | 0.63 | 0.01 | 36.49 | 62.62 | 0.89 |
| 4 / 1 . | 61.88 | 24.47 | 5.41 | 8.45 | 0.24 | 100.45 | 2.73 | 1.27 | 0.26 | 0.72 | 0.01 | 25.77 | 72.85 | 1.38 |
| 68 / 1 . | 60.20 | 25.23 | 6.40 | 7.69 | 0.14 | 99.66 | 2.68 | 1.33 | 0.31 | 0.66 | 0.01 | 31.24 | 67.95 | 0.81 |
| 69 / 1 . | 61.62 | 24.37 | 5.57 | 8.30 | 0.15 | 100.01 | 2.73 | 1.27 | 0.26 | 0.71 | 0.01 | 26.83 | 72.30 | 0.87 |
| 70 / 1 . | 61.59 | 24.14 | 5.47 | 8.28 | 0.22 | 99.70 | 2.74 | 1.27 | 0.26 | 0.71 | 0.01 | 26.39 | 72.33 | 1.28 |
| 71 / 1 . | 60.88 | 24.41 | 5.71 | 7.93 | 0.11 | 99.03 | 2.72 | 1.29 | 0.27 | 0.69 | 0.01 | 28.26 | 71.10 | 0.65 |
| 84 / 1 . | 60.91 | 24.91 | 6.31 | 7.80 | 0.15 | 100.08 | 2.70 | 1.30 | 0.30 | 0.67 | 0.01 | 30.65 | 68.50 | 0.84 |
| 83 / 1 . | 60.46 | 24.99 | 6.31 | 7.74 | 0.24 | 99.74 | 2.69 | 1.31 | 0.30 | 0.67 | 0.01 | 30.64 | 68.00 | 1.36 |
| 82 / 1 . | 60.46 | 25.11 | 6.46 | 7.68 | 0.22 | 99.93 | 2.69 | 1.32 | 0.31 | 0.66 | 0.01 | 31.33 | 67.42 | 1.25 |
| 81 / 1 . | 61.37 | 24.31 | 5.69 | 8.02 | 0.09 | 99.48 | 2.73 | 1.28 | 0.27 | 0.69 | 0.01 | 28.01 | 71.46 | 0.53 |
| 63 / 1 . | 61.66 | 24.52 | 5.60 | 8.18 | 0.29 | 100.25 | 2.73 | 1.28 | 0.27 | 0.70 | 0.02 | 26.97 | 71.34 | 1.69 |
| 64 / 1 . | 61.77 | 24.21 | 5.55 | 8.12 | 0.13 | 99.78 | 2.74 | 1.27 | 0.26 | 0.70 | 0.01 | 27.19 | 72.03 | 0.78 |
| 65 / 1 . | 61.59 | 24.30 | 5.60 | 8.36 | 0.13 | 99.98 | 2.73 | 1.27 | 0.27 | 0.72 | 0.01 | 26.80 | 72.44 | 0.77 |
| 52 / 1 . | 59.12 | 25.76 | 7.48 | 7.10 | 0.18 | 99.64 | 2.64 | 1.36 | 0.36 | 0.62 | 0.01 | 36.43 | 62.53 | 1.04 |
| 51 / 1 . | 60.79 | 24.82 | 6.16 | 7.86 | 0.19 | 99.82 | 2.70 | 1.30 | 0.29 | 0.68 | 0.01 | 29.90 | 69.01 | 1.09 |
| 50 / 1 . | 62.38 | 23.44 | 4.73 | 8.60 | 0.22 | 99.36 | 2.78 | 1.23 | 0.23 | 0.74 | 0.01 | 23.01 | 75.71 | 1.28 |
| 75 / 1 . | 59.52 | 26.00 | 7.24 | 7.48 | 0.11 | 100.35 | 2.64 | 1.36 | 0.34 | 0.64 | 0.01 | 34.61 | 64.75 | 0.64 |
| 76 / 1 . | 61.50 | 24.43 | 5.70 | 8.20 | 0.16 | 99.98 | 2.73 | 1.28 | 0.27 | 0.71 | 0.01 | 27.49 | 71.61 | 0.90 |
| 90 / 1 . | 61.62 | 24.45 | 5.68 | 8.21 | 0.24 | 100.20 | 2.73 | 1.28 | 0.27 | 0.70 | 0.01 | 27.30 | 71.35 | 1.35 |
| 89 / 1 . | 61.55 | 24.41 | 5.59 | 8.31 | 0.21 | 100.07 | 2.73 | 1.27 | 0.27 | 0.71 | 0.01 | 26.77 | 72.04 | 1.19 |
| 106 / 1 . | 60.47 | 25.01 | 6.34 | 8.13 | 0.16 | 100.11 | 2.69 | 1.31 | 0.30 | 0.70 | 0.01 | 29.83 | 69.27 | 0.90 |

Appendix II.4.3: Quartz microdiorite (SSSK50)

| **a.n.** | **SiO2** | **Al2O3** | **CaO** | **Na2O** | **K2O** | **Total** | **Si** | **Al** | **Ca** | **Na** | **K** | **An** | **Ab** | **Or** |
| --- | --- | --- | --- | --- | --- | --- | --- | --- | --- | --- | --- | --- | --- | --- |
| 138 / 1 . | 61.77 | 24.58 | 5.64 | 8.22 | 0.20 | 100.40 | 2.73 | 1.28 | 0.27 | 0.70 | 0.01 | 27.16 | 71.69 | 1.15 |
| 139 / 1 . | 62.66 | 24.31 | 5.12 | 8.56 | 0.30 | 100.95 | 2.75 | 1.26 | 0.24 | 0.73 | 0.02 | 24.40 | 73.89 | 1.71 |
| 170 / 1 . | 62.52 | 24.21 | 4.86 | 8.74 | 0.16 | 100.49 | 2.75 | 1.26 | 0.23 | 0.75 | 0.01 | 23.31 | 75.80 | 0.89 |

Appendix II.4.4: Tonalite (SNKM56)

| **a.n.** | **SiO2** | **Al2O3** | **CaO** | **Na2O** | **K2O** | **Total** | **Si** | **Al** | **Ca** | **Na** | **K** | **An** | **Ab** | **Or** |
| --- | --- | --- | --- | --- | --- | --- | --- | --- | --- | --- | --- | --- | --- | --- |
| 17 / 1 . | 69.16 | 19.76 | 0.00 | 11.97 | 0.02 | 100.91 | 2.99 | 1.01 | 0.00 | 1.00 | 0.00 | 0.01 | 99.87 | 0.12 |
| 19 / 1 . | 67.02 | 20.19 | 0.97 | 11.09 | 0.13 | 99.68 | 2.95 | 1.05 | 0.05 | 0.95 | 0.01 | 4.58 | 94.70 | 0.72 |
| 18 / 1 . | 68.56 | 19.85 | 0.45 | 11.67 | 0.17 | 100.84 | 2.98 | 1.02 | 0.02 | 0.98 | 0.01 | 2.08 | 96.98 | 0.94 |
| 20 / 1 . | 66.30 | 21.33 | 1.86 | 10.32 | 0.06 | 99.90 | 2.91 | 1.10 | 0.09 | 0.88 | 0.00 | 9.04 | 90.63 | 0.34 |
| 21 / 1 . | 66.45 | 21.04 | 1.58 | 10.65 | 0.05 | 99.82 | 2.92 | 1.09 | 0.07 | 0.91 | 0.00 | 7.54 | 92.17 | 0.29 |
| 22 / 1 . | 67.22 | 20.30 | 1.05 | 10.78 | 0.10 | 99.54 | 2.95 | 1.05 | 0.05 | 0.92 | 0.01 | 5.08 | 94.33 | 0.58 |
| 23 / 1 . | 66.76 | 20.92 | 1.54 | 10.77 | 0.08 | 100.05 | 2.92 | 1.08 | 0.07 | 0.91 | 0.00 | 7.28 | 92.29 | 0.42 |
| 24 / 1 . | 66.56 | 20.76 | 1.55 | 10.18 | 0.09 | 99.35 | 2.93 | 1.08 | 0.07 | 0.87 | 0.00 | 7.72 | 91.76 | 0.52 |
| 25 / 1 . | 68.86 | 19.68 | 0.29 | 11.36 | 0.07 | 100.53 | 2.99 | 1.01 | 0.01 | 0.96 | 0.00 | 1.37 | 98.21 | 0.42 |
| 44 / 1 . | 67.40 | 20.68 | 1.17 | 10.72 | 0.09 | 100.02 | 2.94 | 1.06 | 0.05 | 0.91 | 0.01 | 5.64 | 93.84 | 0.52 |
| 45 / 1 . | 67.25 | 20.97 | 1.10 | 11.05 | 0.11 | 100.59 | 2.93 | 1.08 | 0.05 | 0.93 | 0.01 | 5.20 | 94.17 | 0.63 |
| 46 / 1 . | 67.81 | 20.35 | 0.83 | 10.76 | 0.10 | 99.94 | 2.96 | 1.05 | 0.04 | 0.91 | 0.01 | 4.06 | 95.38 | 0.56 |

Appendix II.4.5: Biotite monzogranite (STGL38)

| **a.n.** | **SiO2** | **Al2O3** | **CaO** | **Na2O** | **K2O** | **Total** | **Si** | **Al** | **Ca** | **Na** | **K** | **An** | **Ab** | **Or** |
| --- | --- | --- | --- | --- | --- | --- | --- | --- | --- | --- | --- | --- | --- | --- |
| 109 / 1 . | 65.76 | 21.94 | 2.67 | 10.12 | 0.09 | 100.58 | 2.87 | 1.13 | 0.13 | 0.86 | 0.00 | 12.66 | 86.84 | 0.51 |
| 108 / 1 . | 66.09 | 21.45 | 2.21 | 10.13 | 0.22 | 100.09 | 2.90 | 1.11 | 0.10 | 0.86 | 0.01 | 10.62 | 88.10 | 1.29 |
| 117 / 1 . | 65.63 | 21.84 | 2.52 | 9.99 | 0.08 | 100.06 | 2.88 | 1.13 | 0.12 | 0.85 | 0.00 | 12.16 | 87.35 | 0.48 |
| 118 / 1 . | 66.61 | 21.16 | 1.63 | 10.34 | 0.18 | 99.92 | 2.92 | 1.09 | 0.08 | 0.88 | 0.01 | 7.92 | 91.04 | 1.04 |
| 119 / 1 . | 65.67 | 21.74 | 2.49 | 9.50 | 0.19 | 99.58 | 2.89 | 1.13 | 0.12 | 0.81 | 0.01 | 12.50 | 86.39 | 1.11 |
| 121 / 1 . | 65.08 | 22.04 | 2.91 | 9.84 | 0.15 | 100.02 | 2.86 | 1.14 | 0.14 | 0.84 | 0.01 | 13.91 | 85.25 | 0.85 |
| 127 / 1 . | 65.68 | 21.71 | 2.27 | 10.15 | 0.13 | 99.92 | 2.88 | 1.12 | 0.11 | 0.86 | 0.01 | 10.91 | 88.37 | 0.72 |
| 128 / 1 . | 65.57 | 21.78 | 2.36 | 10.15 | 0.14 | 99.99 | 2.88 | 1.13 | 0.11 | 0.86 | 0.01 | 11.30 | 87.90 | 0.80 |
| 131 / 1 . | 66.35 | 21.23 | 1.71 | 10.44 | 0.11 | 99.84 | 2.91 | 1.10 | 0.08 | 0.89 | 0.01 | 8.25 | 91.12 | 0.63 |
| 130 / 1 . | 66.18 | 21.62 | 2.21 | 9.43 | 0.13 | 99.58 | 2.90 | 1.12 | 0.10 | 0.80 | 0.01 | 11.36 | 87.82 | 0.82 |
| 129 / 1 . | 67.32 | 20.92 | 1.50 | 10.92 | 0.14 | 100.80 | 2.92 | 1.07 | 0.07 | 0.92 | 0.01 | 7.01 | 92.24 | 0.75 |
| 133 / 1 . | 65.21 | 21.64 | 2.68 | 10.00 | 0.12 | 99.65 | 2.88 | 1.13 | 0.13 | 0.86 | 0.01 | 12.81 | 86.49 | 0.70 |
| 132 / 1 . | 65.94 | 21.46 | 2.23 | 10.06 | 0.11 | 99.79 | 2.90 | 1.11 | 0.10 | 0.86 | 0.01 | 10.83 | 88.55 | 0.62 |
| 150 / 1 . | 65.23 | 21.64 | 2.47 | 9.88 | 0.10 | 99.32 | 2.88 | 1.13 | 0.12 | 0.85 | 0.01 | 12.04 | 87.38 | 0.57 |
| 149 / 1 . | 66.37 | 21.52 | 2.12 | 10.75 | 0.09 | 100.85 | 2.89 | 1.11 | 0.10 | 0.91 | 0.01 | 9.76 | 89.73 | 0.52 |

Appendix II.5: Alkali feldspars

Appendix II.5.1: Quartz microdiorite (SSSK50)

| **a.n.** | **SiO2** | **Al2O3** | **Na2O** | **K2O** | **Total** | **Si** | **Al** | **Na** | **K** | **An** | **Ab** | **Or** |
| --- | --- | --- | --- | --- | --- | --- | --- | --- | --- | --- | --- | --- |
| 152 / 1 . | 64.14 | 18.63 | 0.58 | 16.49 | 99.84 | 2.98 | 1.02 | 0.05 | 0.98 | 0.00 | 5.11 | 94.89 |
| 154 / 1 . | 64.18 | 18.59 | 0.65 | 16.27 | 99.70 | 2.98 | 1.02 | 0.06 | 0.96 | 0.00 | 5.71 | 94.29 |
| 153 / 1 . | 64.28 | 18.77 | 0.59 | 16.23 | 99.87 | 2.98 | 1.02 | 0.05 | 0.96 | 0.00 | 5.23 | 94.77 |
| 107 / 1 . | 64.00 | 18.89 | 0.71 | 16.54 | 100.14 | 2.96 | 1.03 | 0.06 | 0.98 | 0.00 | 6.08 | 93.92 |
| 106 / 1 . | 64.34 | 18.69 | 0.50 | 16.46 | 100.00 | 2.98 | 1.02 | 0.05 | 0.97 | 0.27 | 4.43 | 95.30 |
| 108 / 1 . | 64.45 | 18.57 | 0.83 | 16.26 | 100.11 | 2.98 | 1.01 | 0.07 | 0.96 | 0.00 | 7.22 | 92.78 |
| 120 / 1 . | 63.84 | 18.72 | 0.39 | 16.46 | 99.40 | 2.97 | 1.03 | 0.04 | 0.98 | 0.00 | 3.52 | 96.48 |
| 123 / 1 . | 64.15 | 18.71 | 0.38 | 16.88 | 100.13 | 2.97 | 1.02 | 0.03 | 1.00 | 0.00 | 3.34 | 96.66 |

Appendix II.5.2: Granodiorite (SSGL32, SDIA4, SBGS54)

| **a.n.** | **SiO2** | **Al2O3** | **Na2O** | **K2O** | **Total** | **Si** | **Al** | **Na** | **K** | **An** | **Ab** | **Or** |
| --- | --- | --- | --- | --- | --- | --- | --- | --- | --- | --- | --- | --- |
| 12 / 1 . | 63.76 | 18.45 | 0.58 | 16.41 | 99.20 | 2.98 | 1.02 | 0.05 | 0.98 | 0.27 | 5.09 | 94.64 |
| 10 / 1 . | 64.22 | 18.75 | 0.37 | 16.79 | 100.12 | 2.98 | 1.02 | 0.03 | 0.99 | 0.05 | 3.21 | 96.73 |
| 11 / 1 . | 64.34 | 18.49 | 0.51 | 16.24 | 99.58 | 2.99 | 1.01 | 0.05 | 0.96 | 0.10 | 4.54 | 95.36 |
| 9 / 1 . | 64.56 | 18.81 | 0.43 | 17.02 | 100.81 | 2.97 | 1.02 | 0.04 | 1.00 | 0.18 | 3.66 | 96.16 |
| 14 / 1 . | 63.75 | 18.45 | 0.44 | 16.49 | 99.13 | 2.98 | 1.02 | 0.04 | 0.98 | 0.14 | 3.93 | 95.93 |
| 16 / 1 . | 63.90 | 18.60 | 0.47 | 16.51 | 99.48 | 2.98 | 1.02 | 0.04 | 0.98 | 0.12 | 4.15 | 95.73 |
| 15 / 1 . | 63.99 | 18.45 | 0.66 | 16.40 | 99.50 | 2.98 | 1.01 | 0.06 | 0.97 | 0.20 | 5.71 | 94.08 |
| 39 / 1 . | 64.15 | 18.74 | 0.47 | 17.11 | 100.48 | 2.97 | 1.02 | 0.04 | 1.01 | 0.20 | 4.01 | 95.78 |
| 28 / 1 . | 63.92 | 18.48 | 0.51 | 16.26 | 99.17 | 2.98 | 1.02 | 0.05 | 0.97 | 0.25 | 4.53 | 95.22 |

Appendix II.5.3: Tonalite (SNKM56)

| **a.n.** | **SiO2** | **Al2O3** | **Na2O** | **K2O** | **Total** | **Si** | **Al** | **Na** | **K** | **An** | **Ab** | **Or** |
| --- | --- | --- | --- | --- | --- | --- | --- | --- | --- | --- | --- | --- |
| 2 / 1 . | 64.03 | 18.34 | 0.42 | 17.30 | 100.08 | 2.98 | 1.00 | 0.04 | 1.03 | 0.21 | 3.54 | 96.25 |
| 9 / 1 . | 64.23 | 18.68 | 0.28 | 17.33 | 100.52 | 2.97 | 1.02 | 0.03 | 1.02 | 0.25 | 2.43 | 97.33 |
| 8 / 1 . | 64.06 | 18.55 | 0.46 | 16.98 | 100.05 | 2.97 | 1.02 | 0.04 | 1.01 | 0.17 | 3.97 | 95.86 |
| 7 / 1 . | 63.41 | 18.37 | 0.35 | 17.31 | 99.44 | 2.97 | 1.01 | 0.03 | 1.03 | 0.27 | 2.99 | 96.75 |
| 5 / 1 . | 63.85 | 18.36 | 0.37 | 17.41 | 99.99 | 2.97 | 1.01 | 0.03 | 1.03 | 0.15 | 3.16 | 96.69 |
| 6 / 1 . | 63.62 | 18.17 | 0.42 | 17.14 | 99.36 | 2.98 | 1.00 | 0.04 | 1.02 | 0.19 | 3.62 | 96.19 |
| 32 / 1 . | 63.67 | 18.34 | 0.45 | 16.90 | 99.36 | 2.97 | 1.01 | 0.04 | 1.01 | 0.02 | 3.89 | 96.09 |
| 26 / 1 . | 63.75 | 18.27 | 0.48 | 17.02 | 99.52 | 2.98 | 1.01 | 0.04 | 1.01 | 0.29 | 4.13 | 95.59 |
| 31 / 1 . | 63.58 | 18.45 | 0.52 | 16.60 | 99.14 | 2.97 | 1.02 | 0.05 | 0.99 | 0.34 | 4.53 | 95.13 |
| 39 / 1 . | 63.70 | 18.58 | 0.33 | 16.81 | 99.43 | 2.97 | 1.02 | 0.03 | 1.00 | 0.31 | 2.92 | 96.77 |

Appendix II.5.4: Two-mica monzogranite (SBKO52, SBLD53)

| **a.n.** | **SiO2** | **Al2O3** | **Na2O** | **K2O** | **Total** | **Si** | **Al** | **Na** | **K** | **An** | **Ab** | **Or** |
| --- | --- | --- | --- | --- | --- | --- | --- | --- | --- | --- | --- | --- |
|  | 64.29 | 18.55 | 0.71 | 16.76 | 100.31 | 2.97 | 1.02 | 0.03 | 1.01 | 0.00 | 2.85 | 97.15 |
|  | 64.26 | 18.65 | 0.33 | 17.13 | 100.38 | 2.98 | 1.01 | 0.03 | 1.01 | 0.34 | 2.80 | 96.86 |
|  | 64.04 | 18.44 | 0.32 | 17.00 | 99.81 | 2.98 | 1.01 | 0.03 | 1.00 | 0.16 | 2.95 | 96.89 |
|  | 64.11 | 18.44 | 0.34 | 16.81 | 99.70 | 2.98 | 1.01 | 0.03 | 1.01 | 0.27 | 2.45 | 97.29 |
|  | 64.21 | 18.45 | 0.28 | 17.07 | 100.01 | 2.97 | 1.02 | 0.03 | 1.02 | 0.19 | 2.99 | 96.82 |
|  | 63.80 | 18.55 | 0.35 | 17.10 | 99.80 | 2.98 | 1.01 | 0.02 | 1.01 | 0.28 | 1.86 | 97.86 |
|  | 64.01 | 18.46 | 0.21 | 16.95 | 99.63 | 2.98 | 1.01 | 0.02 | 1.01 | 0.28 | 1.86 | 97.86 |
|  | 64.08 | 18.37 | 0.30 | 16.88 | 99.63 | 2.98 | 1.01 | 0.03 | 1.00 | 0.19 | 2.66 | 97.15 |
